**Title : Genetic diversity of Collaborative Cross mice controls viral replication,  
clinical severity and brain pathology induced by Zika virus infection,  
independently of *Oas1b*.**

Running title : Host genetic susceptibility to Zika virus disease

Caroline Manet,<sup>a</sup> Etienne Simon-Lorière,<sup>b</sup> Grégory Jouvion,<sup>c,d</sup> David Hardy,<sup>c</sup> Matthieu Prot,<sup>b</sup>

Marie Flamand,<sup>e</sup> Jean-Jacques Panthier,<sup>a</sup> Anavaj Sakuntabhai,<sup>f</sup> Xavier Montagutelli<sup>a#</sup>

**Affiliations:**

<sup>a</sup>Mouse Genetics Laboratory, Institut Pasteur, Department of Genomes and Genetics, Institut Pasteur, 75015 Paris, France

<sup>b</sup> Evolutionary Genomics of RNA Viruses, Department of Virology, Institut Pasteur, CNRS UMR 3569, 75015 Paris, France

<sup>c</sup>Sorbonne Université, INSERM, Pathophysiology of Pediatric Genetic Diseases, AP-HP, Hôpital Armand-Trousseau, UF de Génétique Moléculaire, 75012 Paris, France

<sup>d</sup>Institut Pasteur, Experimental Neuropathology Unit, Department of Global Health, 75015 Paris, France

<sup>e</sup>Structural Virology Unit, Department of Virology, CNRS UMR 3569, Institut Pasteur, 75015 Paris, France

<sup>f</sup>Functional Genetics of Infectious Diseases Unit, Department of Global Health, Institut Pasteur, CNRS UMR 2000, 75015 Paris, France

#Address correspondence to Xavier Montagutelli, [xavier.montagutelli@pasteur.fr](mailto:xavier.montagutelli@pasteur.fr)

**Word counts :** Abstract : 225 - Text : 7982

1 **ABSTRACT**

2 The explosive spread of Zika virus (ZIKV) has been associated with major variations in severe  
3 disease and congenital afflictions among infected populations, suggesting an influence of host  
4 genes. We investigated how genome-wide variants could impact susceptibility to ZIKV infection  
5 in mice. We first describe that the susceptibility of *Ifnar1* knockout mice is largely influenced by  
6 their genetic background. We then show that the broad genetic diversity of Collaborative Cross  
7 mice, which receptor to type I interferon (IFNAR) was blocked by anti-IFNAR antibody,  
8 expressed phenotypes ranging from complete resistance to severe symptoms and death with large  
9 variations in the peak and rate of decrease of plasma viral load, in brain viral load, in brain  
10 histopathology and in viral replication rate in infected cells. Differences of susceptibility  
11 between CC strains were correlated between Zika, Dengue and West Nile viruses. We identified  
12 highly susceptible and resistant mouse strains as new models to investigate the mechanisms of  
13 human ZIKV disease and other flavivirus infections. Genetic analyses revealed that phenotypic  
14 variations are driven by multiple genes with small effects, reflecting the complexity of ZIKV  
15 disease susceptibility in human population. Notably, our results rule out a role of the *Oas1b* gene  
16 in the susceptibility to ZIKV. Altogether, this study emphasizes the role of host genes in the  
17 pathogeny of ZIKV infection and lays the foundation for further genetic and mechanistic studies.

18

19 **IMPORTANCE**

20 In recent outbreaks, ZIKV has infected millions of people and induced rare but potentially severe  
21 complications, including Guillain-Barré syndrome and encephalitis in adults. While several viral  
22 sequence variants were proposed to enhance the pathogenicity of ZIKV, the influence of host

23 genetic variants in the clinical heterogeneity remains mostly unexplored. We have addressed this  
24 question using a mouse panel which models the genetic diversity of human population and a  
25 ZIKV strain from a recent clinical isolate. Through a combination of *in vitro* and *in vivo*  
26 approaches, we demonstrate that multiple host genetic variants determine viral replication in  
27 infected cells, and clinical severity, kinetics of blood viral load and brain pathology in mice. We  
28 describe new mouse models expressing high susceptibility or resistance to ZIKV and to other  
29 flaviviruses. These models will facilitate the identification and mechanistic characterization of  
30 host genes that influence ZIKV pathogenesis.

31

## 32 **KEYWORDS**

33 Zika virus, flavivirus, mouse model, host genetics, genetic diversity, Collaborative Cross

34

35

36 Zika virus (ZIKV) is a mosquito-borne flavivirus isolated in 1947 from a febrile rhesus  
37 monkey in Uganda (1). Until 2007, ZIKV had circulated in Africa and Asia causing mild flu-like  
38 syndromes, with rare reported clinical cases (2). However, during recent epidemics, ZIKV  
39 infection triggered severe complications including Guillain-Barré syndrome and encephalitis in  
40 adults (3, 4), and congenital malformations in fetuses of infected pregnant women (5, 6). Viral  
41 mutations may have contributed to ZIKV enhanced pathogenicity (7, 8) but only partly explain  
42 the variable proportions of symptomatic infections (9) and the increased incidence of congenital  
43 Zika syndrome (CZS) in Polynesia (10) and Brazil (11), suggesting a role for host genetic  
44 variants. Recent evidence indicates that the regulation of innate immunity genes is driven by host  
45 genetic background in human fetal brain-derived neural stem cells (hNSCs) infected *in vitro* with  
46 ZIKV (12). Additionally, the analysis of pairs of dizygotic twins exposed to ZIKV during  
47 pregnancy and discordant for CZS suggests multigenic host susceptibility to ZIKV-induced brain  
48 malformations (13).

49 Multiple mouse models have been proposed to decipher the mechanisms of ZIKV disease  
50 pathogenesis (14, 15). These models allow the investigation of several key features of human  
51 infection, such as neuronal damage (16, 17), sexual and vertical transmission (18-21), fetal  
52 demise and CZS (22-25). However, while non-structural ZIKV proteins efficiently inhibit innate  
53 antiviral responses in humans (26, 27) allowing viral replication, ZIKV replicates poorly in wild-  
54 type mice due to its NS5 protein's inability to antagonize STAT2 and type I interferon (IFN)  
55 response as in humans (28). Effective systemic infection in mice occurs when this response is  
56 abrogated by genetic inactivation of the *Ifnar1* gene (29) or by blocking the type I IFN receptor  
57 with the MAR1-5A3 monoclonal antibody (mAb) (30, 31). So far, host genetic factors involved  
58 in mouse susceptibility to ZIKV infection have been investigated mainly through reverse genetic  
59 approaches, by studying the consequences of genetic ablation of specific genes, such as innate or

60 adaptive immunity genes (29, 32-35). While these models have contributed to our understanding  
61 of the mechanisms of ZIKV disease, they do not model the simultaneous contribution of variants  
62 in multiple pathways, as would most likely be observed in the natural population. A recent study  
63 has reported strain-specific differences in the susceptibility to neonatal ZIKV infection across  
64 four mouse laboratory strains, affecting neuropathology and behavior in adulthood (36). More  
65 extensive studies investigating the role of genome-wide genetic variations on the susceptibility to  
66 ZIKV infection are needed, using mouse models that accurately reflect the phenotypic and  
67 genetic diversity of the human population (37).

68 In this study, we addressed this question using the two types of susceptible mouse  
69 models. First, since the phenotype of a single gene modification often varies under the influence  
70 of modifier genes (38, 39), we assessed the effect of host genetic background on the  
71 susceptibility of *Ifnar1*-deficient mice. We then investigated the impact of host genetic diversity  
72 on the susceptibility to ZIKV infection in the Collaborative Cross (CC), a panel of recombinant  
73 inbred mice produced by a systematic cross between eight founder inbred strains, including five  
74 classic laboratory strains and three wild-derived strains (40). The founder strains capture  
75 approximately 90% of the genetic variants present in the *Mus musculus* species (41) and the  
76 resulting CC strains, which segregate an estimated 45 million polymorphisms, have more genetic  
77 diversity than the human population (42). Extensive variations in pathogenic phenotypes have  
78 been previously reported in the CC panel after viral (43-50), bacterial (51, 52) and fungal (53)  
79 infections, demonstrating that this resource is ideally suited for investigating the role of host  
80 genetic variants in the pathophysiology of infectious diseases (54).

81 Susceptibility to ZIKV in *Ifnar1*-deficient mice was strongly influenced by the genetic  
82 background, with practical implications for virology studies and allowing for future

83 identification of modifier genes. The challenge of 35 immunocompetent CC strains with ZIKV  
84 after MAR1-5A3 mAb treatment allowed efficient viral replication. We show that genetic  
85 diversity in the CC panel enabled large variations in the clinical severity of ZIKV disease, in the  
86 peak and kinetics of plasma viral load and in the severity of ZIKV-induced brain pathology.  
87 Genetic diversity also resulted in differences in the permissiveness of CC mouse cells to viral  
88 replication which likely contributes to the *in vivo* phenotypic range. In a subset of CC strains, we  
89 found correlated differences of susceptibility to ZIKV, dengue virus (DENV) and West Nile  
90 virus (WNV), suggesting shared underlying mechanisms. We identified highly susceptible and  
91 resistant mouse strains as new models to investigate the mechanisms of human ZIKV disease and  
92 other flavivirus infections. Finally, genetic analysis revealed that susceptibility to ZIKV in the  
93 CC is driven by multiple loci with small individual effects, and that *Oas1b*, a major determinant  
94 of mouse susceptibility to WNV, is not involved.  
95

## 96 **RESULTS**

### 97 **Genetic background controls the susceptibility of *Ifnar1*-deficient mice to ZIKV**

98 Many studies have used *Ifnar1* knock-out mice on 129S2/SvPas (129) (55, 56) or C57BL/6J  
99 (B6) (23, 29, 34) inbred backgrounds, but the differences in ZIKV susceptibility between these  
100 two strains have not been reported and remain unclear due to heterogeneous experimental  
101 conditions between studies. We compared the susceptibility of age-matched 129S2/SvPas-*Ifnar1*<sup>-/-</sup>  
102 (129-*Ifnar1*) and C57BL/6J-*Ifnar1*<sup>-/-</sup> (B6-*Ifnar1*) mice infected intraperitoneally (IP) with 10<sup>7</sup>  
103 FFUs of FG15 ZIKV. B6-*Ifnar1* mice showed increasingly severe symptoms, with body weight  
104 loss, ruffled fur, ataxia and hind limb paralysis from day 4 p.i. and were all (10/10) moribund or  
105 dead by day 7 p.i.. By contrast, 129-*Ifnar1* mice developed mild symptoms (ruffled fur, hunched  
106 back) from day 6 p.i. with only one mouse dying on day 9 p.i. while the others recovered (FIG  
107 1), demonstrating that the susceptibility to ZIKV infection conferred by *Ifnar1* genetic  
108 inactivation is critically influenced by the host genetic background.

### 109 **mAb blockade of IFNAR is a robust model to study ZIKV infection in CC mice**

110 *Ifnar1* genetic deficiency abrogates permanently IFN- $\alpha/\beta$ -mediated immune responses but is  
111 not currently available on diverse genetic backgrounds. We therefore tested the suitability of  
112 transient IFNAR blockade mediated by mAb treatment as a model to study ZIKV infection in  
113 genetically diverse mice like the CC. Since MAR1-5A3 mAb was generated in a laboratory  
114 strain (129-*Ifnar1* mice) (30), we first assessed its efficacy by Western Blot analysis on mouse  
115 embryonic fibroblasts (MEFs) isolated from two CC strains (CC001 and CC071) both of which  
116 inherited the *Ifnar1* allele from the CAST/Ei wild-derived strain (57), by comparison with B6  
117 MEFs. IFNAR stimulation by IFN- $\alpha/\beta$  activates the JAK1/TYK2 pathway and results in the  
118 phosphorylation of STAT1. We found that, in B6, CC001 and CC071 MEFs, STAT1

119 phosphorylation was equally induced by murine IFN- $\alpha$  and fully inhibited by the MAR1-5A3  
120 mAb (FIG 2A).

121 To assess MAR1-5A3 mAb efficacy *in vivo*, we infected CC001 and CC071 strains with  $10^7$   
122 FFUs of FG15 ZIKV IP and we measured the kinetics of plasma viral load in mice with and  
123 without 2 mg mAb treatment 24 hours prior to infection. Consistent with previous studies in B6  
124 (29, Smith, 2017 #31, Scott, 2018 #25) and BALB/c (58) mice, viral load was consistently 4 to 5  
125  $\log_{10}$  units higher in mAb-treated mice of both CC001 and CC071 strains compared to untreated  
126 mice, demonstrating that MAR1-5A3 mAb treatment successfully increases CC mice  
127 permissiveness to ZIKV replication (FIG 2B).

128 We then measured the kinetics of plasma viral load in 129-*Ifnar1* strain as well as in four  
129 mAb-treated CC strains infected with  $10^7$  FFUs of FG15 ZIKV IP. We established that the peak  
130 plasma viral load occurred in most individuals at day 2 p.i., independently of mouse genetic  
131 background (FIG 2C).

132 In previous studies, viral loads have been measured either by FFU titration or by RT-qPCR  
133 quantification of viral genome copies. We compared these two methods in B6-*Ifnar1*, 129-  
134 *Ifnar1*, and in ten mAb-treated CC strains. We performed Focus Forming Assays (FFA) to  
135 measure viral particles in the plasma at day 2 p.i. and confirmed the production of infectious  
136 ZIKV in the blood of all strains (FIG 2D). Next, we compared the plasma viral load measured by  
137 RT-qPCR and by FFA. We found that these two parameters were strongly correlated over a 2  
138  $\log_{10}$  range (Pearson coefficient,  $r^2=0.89$ ,  $p=9.9 \times 10^{-17}$ ), with the number of genome copies being  
139 on average 3  $\log_{10}$  units higher than the number of FFUs (FIG 2D). We therefore validated that  
140 RT-qPCR measurement of plasma viral load could be used as a labor-efficient proxy for viremia  
141 throughout the study.



142 Finally, we compared plasma viral load at day 2 p.i. between males and females in 129-  
143 *Ifnar1* and in four mAb-treated CC strains in which both sexes had been tested. We found no  
144 significant difference between sexes across diverse genetic backgrounds (two-way ANOVA,  
145  $p=0.24$ ; FIG 2E), validating the use of merged data from males and females in mouse ZIKV  
146 infection experiments.

### 147 **CC genetic diversity drives ZIKV disease severity and plasma viral load**

148 To explore broad genetic variation, we assessed the susceptibility of mAb-treated mice of 35  
149 CC strains. B6-*Ifnar1*, 129-*Ifnar1* and mAb-treated B6 mice were included as reference strains.  
150 Only mice from three CC strains developed symptoms as shown on FIG 3A which summarizes  
151 clinical observations at day 7 p.i. CC021 and CC026 mice recovered and survived, while  
152 symptoms worsened in 7/9 (78%) CC071 mice which were moribund or died between days 7 and  
153 9 p.i.

154 Plasma viral load was measured on days 2 and 6 p.i. At day 2 p.i., which corresponds to its  
155 peak, viral load was generally characterized by small within-strain heterogeneity and large inter-  
156 strain variations spread over a 2.8  $\log_{10}$  range (FIG 3B), demonstrating a strong effect of host  
157 genes (Kruskal-Wallis,  $p=4.8 \times 10^{-15}$ ) with a broad sense heritability of 86% (59). The three  
158 symptomatic CC strains showed the highest peak viral load, close to that of B6-*Ifnar1* and 129-  
159 *Ifnar1* mice. However, other strains (such as CC005 and CC061) had similarly high viral loads  
160 but never showed any clinical signs of disease, indicating that peak viral load is unlikely the sole  
161 factor controlling clinical severity. At day 6 p.i., within-strain variations were larger and more  
162 heterogeneous, but we still observed highly significant inter-strain differences (Kruskal-Wallis,  
163  $p=1.1 \times 10^{-10}$ ). Interestingly, viral load on days 2 and 6 p.i. were only moderately correlated  
164 (Pearson coefficient,  $r^2=0.46$ ;  $p=0.004$ ), indicating that viral load at day 2 p.i. was not predictive  
165 of viral load at day 6 p.i. (see for example CC018 and CC040, or CC026 and CC071).

166 We used the difference of the log<sub>10</sub> plasma viral loads between days 2 and 6 p.i. to estimate  
167 the clearance rate of the virus from the blood stream (FIG 3C; strains sorted by increasing  
168 clearance rate, therefore differently from FIG 3A and B). This rate varied over a 3.3 log<sub>10</sub> range  
169 between strains, demonstrating a strong effect of host genes (Kruskal-Wallis,  $p=2.2 \times 10^{-12}$ ) with a  
170 broad sense heritability of 76%. Likewise, B6-*Ifnar1* mice showed a slower decrease in viral  
171 load than 129-*Ifnar1* mice (Wilcoxon,  $p=1.7 \times 10^{-5}$ ), despite similar peak viral load at day 2 p.i.

172 Overall, genetic diversity in the CC panel controlled clinical severity of ZIKV infection,  
173 mouse survival, and the peak and clearance rate of plasma viral load. Of note, there was no  
174 association, across the 35 CC strains tested, between the peak plasma viral load and the *Ifnar1*  
175 allele inherited from the founder strain (ANOVA,  $p>0.09$ ). This analysis confirms our *in vitro*  
176 data (FIG 2A) and indicates that the variations in peak plasma viral load do not result from  
177 differences in mAb treatment efficacy due to the *Ifnar1* alleles.

178 From this screening, we identified several strains with extreme phenotypes, in particular  
179 CC071 which was the most susceptible to ZIKV infection, CC001, CC011, CC017 or CC060  
180 with low peak plasma viral load, CC040 with slowly decreasing plasma viral load and CC045 or  
181 CC026 with high peak but fast-decreasing plasma viral loads.

### 182 **CC mice show correlated susceptibility to ZIKV, DENV and WNV**

183 We further characterized three CC strains (indicated by arrows on FIG 3B and FIG 3C)  
184 among those showing lowest (CC001) and highest peak viral loads with (CC071) or without  
185 (CC005) clinical symptoms. To establish whether the above differences were specific of the  
186 FG15 ZIKV strain of the Asian lineage, we first assessed the susceptibility of the three selected  
187 strains to the HD78788 ZIKV strain of the African lineage. 129-*Ifnar1* mice and mAb-treated  
188 CC mice were infected with 10<sup>3</sup> FFUs of HD78788 ZIKV IP which proved to be highly  
189 pathogenic in *Ifnar1*-deficient mice with rapid and severe symptoms and 100% mortality (FIG

190 4A). CC001 was fully resistant with no or mild clinical signs (FIG 4A, left and center panels).  
191 By contrast, all CC071 mice were moribund or dead by day 10 p.i., with early and quickly  
192 aggravating symptoms, almost like 129-*Ifnar1* mice. Only 1/5 CC005 mouse died with late  
193 symptoms. Peak viral load (day 2 p.i.) varied over a 2.4 log<sub>10</sub> range and the differences between  
194 strains were similar to those observed with the FG15 ZIKV strain (FIG 3B). Here again, plasma  
195 viral load at day 2 p.i. was the highest in very susceptible CC071 and 129-*Ifnar1* strains and low  
196 in resistant CC001, but it was also very high in CC005 which was moderately susceptible,  
197 confirming that clinical severity does not depend solely on peak plasma viral load.

198 To evaluate whether these differences in susceptibility were specific to ZIKV or extended to  
199 other flaviviruses, we assessed the phenotype of a few strains after infection with DENV and  
200 WNV, two other members of the *Flaviridae* family.

201 We measured plasma viral load after IV infection with 2x10<sup>6</sup> FFUs of KDH0026A DENV in  
202 mAb-treated CC001, CC071 and B6 mice and in 129-*Ifnar1* and B6-*Ifnar1* mice (FIG 4B right).  
203 Most inter-strain differences observed with ZIKV FG15 strain (FIG 4B left, data from FIG 3B)  
204 were conserved with DENV, CC071 displaying the highest plasma viral load in Ab-treated mice.  
205 DENV infection was overall much less clinically severe since only B6-*Ifnar1* mice developed  
206 non-lethal symptoms including ruffled fur, hunched back and ataxia.

207 We also investigated the susceptibility of the selected CC strains to WNV. *Oas1b* was  
208 previously shown to be a major host genetic determinant of susceptibility to WNV in mice (60).  
209 Of note, the three selected CC strains carry the same non-functional allele of *Oas1b* inherited  
210 from the laboratory strain founders, conferring them susceptibility to WNV infection. CC mice  
211 were infected IP with 10<sup>4</sup> FFUs of WNV IS-98-ST1 and monitored for 14 days p.i. (WNV  
212 infection does not require anti-IFNAR mAb treatment in *Oas1b*-deficient mice). All CC071 mice  
213 died 7 days p.i., significantly faster than CC001 and CC005 mice (logrank, p<0.01; FIG 4C, left

214 panel), indicating that genetic diversity between CC strains also influences their susceptibility to  
215 WNV even in the context of *Oas1b* deficiency.

216 To assess whether the differences of susceptibility between these CC strains also applied to  
217 other viruses, we infected them with  $10^2$  PFUs of RVFV ZH548 IP. No significant difference  
218 was found between CC strains (logrank,  $p > 0.05$  for all pair comparisons; FIG 4C, right panel)  
219 which succumbed late from the infection, like the commonly used BALB/cByJ mice.

### 220 **Genetic analysis suggests a polygenic control of susceptibility to ZIKV in CC mice**

221 To identify host genetic factors controlling the susceptibility to ZIKV in CC strains, we  
222 performed a genome-wide association study between the plasma viral loads at days 2 and 6 p.i.  
223 or the decrease rate of plasma viral load, and the genotypes of the 35 CC strains. Genetic  
224 associations were plotted as LOD scores (FIG 5). We did not find genome locations at which  
225 LOD scores reached the minimum 0.1 significance threshold for any of the three traits, while it  
226 would be expected if phenotypic variations were controlled by one or two loci with strong  
227 effects. Therefore, these results suggest that plasma viral load is controlled by multiple small-  
228 effect genetic variants.

### 229 **Genetic diversity of CC strains controls brain viral load and pathology**

230 To assess the influence of host genetics on the brain pathology caused by ZIKV infection,  
231 we further characterized the three previously selected CC strains. We measured the viral load in  
232 the brain 6 days after IP infection with FG15 ZIKV in mAb-treated CC mice and 129-*Ifnar1*  
233 mice (FIG 6, top). CC005 and CC071 which had higher peak plasma viral load also had higher  
234 brain viral load (FIG 6, mean =  $6.5 \log_{10}$  copies/ $\mu\text{g}$  RNA for CC005 and CC071, compared with  $5 \log_{10}$   
235 copies/ $\mu\text{g}$  RNA for CC001). As expected, 129-*Ifnar1* mice showed the highest viral load in  
236 the brain. These results indicate overall correlation between plasma and brain viral loads.

237 Histopathological analysis, carried out in the brain of the same mice (FIG 6 bottom),  
238 revealed different lesion profiles between the four mouse strains. 129-*Ifnar1* mice indeed  
239 displayed the most severe inflammatory lesions (subacute leptomeningo-encephalitis). By  
240 contrast, almost no lesions were detected in the brain of CC001 mice. CC005, and CC071  
241 displayed only minimal to mild encephalitis (more severe for CC005 mice), but with activation  
242 of microglial cells and microglial nodules similar to that of 129-*Ifnar1* mice, as revealed by Iba1  
243 immunolabeling.

244 The nature and intensity of brain histological lesions may depend on the circulating viral  
245 load, on the capacity of the virus and of the mAb to cross the blood-brain barrier and on the  
246 permissiveness of brain cells (in particular neurons and microglia). To assess the differences in  
247 susceptibility of brain cells between CC strains, we performed intra-cerebral infections to deliver  
248 the virus directly into the brain tissue. 129-*Ifnar1* and mAb-untreated CC mice received  $10^5$   
249 FFUs of FG15 ZIKV in the left ventricular region of the brain and were followed for 3 weeks.  
250 Mild and transient symptoms (ruffled fur, hunched back) were observed in a few mice of the  
251 three strains and one CC005 mouse died on day 19 p.i. A second group of CC mice were infected  
252 similarly and euthanized at day 6 p.i. for histological analysis. Differences in brain viral load  
253 between CC strains were similar to those observed after IP infection, with CC005 and CC071  
254 mice showing significantly higher brain viral load than CC001 mice (FIG 7, top). Compared with  
255 IP route of infection, lesions in 129-*Ifnar1* mice were mostly similar, while lesion profiles were  
256 clearly different in the three CC strains (FIG 7, bottom). Strikingly, the most severe lesions were  
257 detected for CC071, with marked subacute leptomeningo-encephalitis and strong activation of  
258 microglial cells (Iba1 staining). CC001 and CC005 mice also displayed inflammatory lesions,  
259 clearly less severe than CC071, with gliosis, microglia activation and microglial nodules.

260        These results indicate that CC strains differ in their permissiveness to viral replication in the  
261 brain and in their susceptibility to ZIKV-induced histological brain damage, independently from  
262 potential differences in the capacity of ZIKV to disseminate to the brain from the circulation.

263        **Viral replication in CC071 cells is increased *in vitro***

264        Differences in peak plasma viral load and results from IC infections suggested that different  
265 rates of viral replication could contribute to the variations in susceptibility between CC strains.  
266 To address this point, we measured the production of viral particles in three cell types infected  
267 with ZIKV FG15. We derived primary MEFs, peritoneal macrophages (PMs) and primary  
268 cultured neurons (PCNs) from CC001 and CC071 strains. Cells were infected with ZIKV FG15  
269 at a MOI of 5. In all three cell types, CC071 cells produced increasingly higher amounts of viral  
270 infectious particles than CC001 cells between 24 and 72 hours (FIG 8). These results suggest that  
271 increased replication rate in CC071 could contribute to its susceptible phenotype.

272

273 **DISCUSSION**

274 ZIKV is a serious public health concern considering the occurrence of severe neurological  
275 complications in adults and congenital malformations that can result from the infection of  
276 pregnant women. The variable outcomes of ZIKV infection in humans has led to hypothesize a  
277 role for host genetic factors (9, 13) although this has never been demonstrated thus far. As for  
278 other infectious diseases, human genetic studies on susceptibility to ZIKV would require large  
279 cohorts of patients and would be confounded by pathogen genetics, pathogen dose, mosquito-  
280 dependent factors and multiple environmental parameters.

281 Several mouse models of human ZIKV infection have already been described and have  
282 substantially improved our understanding of viral tropism, dissemination, pathogenesis,  
283 persistence, transmission and vaccine protection. To overcome the inability of ZIKV to inhibit in  
284 mice IFN induction and signaling pathways as observed in humans (27), most studies have been  
285 performed using *Ifnar1*-deficient mice which have become a reference model. However, high  
286 levels of viral replication can also be achieved by temporary inhibition of IFN signaling by anti-  
287 IFNAR mAb treatment (30, 31, 61) or even in immunocompetent mice by infecting neonates  
288 (36, 62-64) or using a combination of mouse-adapted ZIKV strains and human STAT2 knock-in  
289 mice (65).

290 The choice of the ZIKV strain used in an animal model is important to maximize the  
291 relevance of mouse studies to human infection. Mouse studies have used different ZIKV strains  
292 from the African or Asian lineages. Mouse-adapted strains of the African lineage derived from a  
293 large number of serial passages are more pathogenic in mice at lower doses (34) but carry  
294 mutations that may bias the translatability of results to humans. To avoid this limitation, mouse  
295 studies have often used different ZIKV strains from the Asian lineage derived from clinical  
296 isolates. Genetic differences between these two lineages are suspected to be responsible for the

297 emergence of symptomatic cases in human starting with the Yap Island epidemics in 2007 (7, 8).  
298 Therefore, while the ZIKV strain needs to be standardized in experimental studies, generalization  
299 of the results obtained with one viral strain require confirmation using another strain. Because of  
300 the incidence of neurological complications associated with infections by Asian lineage ZIKV,  
301 we used for our genetic screening a low-passage strain derived from a 2015 case of French  
302 Guyana, at an early stage of the South-American epidemics. Since this strain had not been  
303 adapted to the mouse, high doses were required to achieve high circulating viral loads.

304 Most mouse studies have used either B6-*Ifnar1* or 129-*Ifnar1* strains without specific  
305 rationale and their results cannot be directly compared due to many experimental differences  
306 such as ZIKV strain, dose and route of inoculation (66). Under strictly identical conditions, we  
307 found that B6-*Ifnar1* mice developed more rapid and severe clinical symptoms and higher  
308 mortality than 129-*Ifnar1* mice, despite similar levels of plasma viral RNA at day 2 p.i. We also  
309 found that viral load persisted longer in B6-*Ifnar1* mice. These results show that, under our  
310 experimental conditions, these two *Ifnar1*-deficient strains have clearly distinct susceptibility to  
311 ZIKV. To our knowledge, these two strains have been compared in only one study which found  
312 no difference in survival after WNV infection (67). However, their extreme susceptibility might  
313 have prevented the identification of any difference. Our results have practical implications for  
314 many studies based on *Ifnar1*-deficient mice and motivate further genetic studies to identify the  
315 determinants and mechanisms controlling differences of susceptibility between B6 and 129  
316 inbred backgrounds.

317 To further investigate the role of host natural genetic variants on ZIKV susceptibility, we  
318 leveraged the genetic diversity across CC strains. The CC has been developed as a collection of  
319 inbred strains that more accurately reproduce the genetic diversity and phenotypic range seen in  
320 human population (68). To enable systemic ZIKV replication after parenteral inoculation in



321 diverse genetic backgrounds, we blocked type I IFN response using MAR1-5A3 mAb (23, 31).  
322 However, because CC genetic diversity includes sequence polymorphisms in the *Ifnar1* gene  
323 which could affect the efficacy of mAb-mediated IFNAR inhibition, we confirmed full  
324 abrogation of IFN $\alpha$ -induced STAT1 phosphorylation in MEFs from two CC strains carrying a  
325 wild-derived *Ifnar1* haplotype. Moreover, we showed that the differences in peak plasma viral  
326 load across 35 CC strains were not associated with the *Ifnar1* allele each CC has received from  
327 the founder strains. These results validate that the MAR1-5A3 mAb has similar efficacy across a  
328 broad range of mouse genetic backgrounds, which will be useful to develop new models of viral  
329 infections.

330 A single injection of MAR1-5A3 mAb 24 hours before ZIKV infection resulted in moderate  
331 to very high levels of viral RNA in the blood and brain. ZIKV infection was symptomatic in a  
332 minority of CC strains (3/35), as observed in infected humans (9, 69), and mortality was  
333 observed only in CC071. These results confirm that ZIKV can replicate and establish viremia  
334 without inducing symptoms (29). Moreover, while all symptomatic strains had high peak viral  
335 loads, other strains with similar viral loads (like CC005 or CC061) never developed any signs of  
336 illness, indicating that other pathogenic mechanisms are required to result in symptomatic  
337 infection and that viral load alone does not reliably predict clinical outcome of ZIKV infection in  
338 a genetically diverse mouse population.

339 Since all experimental parameters were carefully standardized between strains (in particular,  
340 the microbiological environment in which they were bred), which resulted in small intra-strain  
341 variations, and since the MAR1-5A3 mAb treatment was similarly effective across strains,  
342 differences in peak viral load between strains can be confidently attributed to host genetic

343 variants. The 86% broad sense heritability further indicates that genetic background is the  
344 principal factor driving peak viral load across CC strains.

345 Viremia decreased between days 2 and 6 p.i., as previously reported in several studies (55,  
346 70, 71) but not in others (29, 56) for reasons that have not been discussed and remain unclear. In  
347 our study, the rate of decrease, which was estimated as the difference in viral load between day 2  
348 and day 6 p.i., showed remarkable homogeneity between individuals of the same CC strain and  
349 very large variations across CC strains. This data resulted again in high broad sense heritability  
350 which demonstrates a strong influence of host genes on this trait. The decrease of circulating  
351 viral load is the net result of ZIKV production in infected tissues, dissemination to the blood  
352 stream and elimination from the circulation. Therefore, host genes could control the kinetics of  
353 viral load through multiple mechanisms.

354 After exploring the range of susceptibility to ZIKV across broad genetic diversity, we  
355 focused our study on a few CC strains exhibiting contrasted phenotypes with the aim of  
356 characterizing new models (72). CC001 is one of the least permissive to ZIKV, with low peak  
357 viral load. At the other extreme of the distribution, CC005 and CC071 have similarly high  
358 plasma viral loads while only CC071 shows symptoms and high mortality. These differences  
359 between CC strains were strikingly conserved with the African, mouse-adapted, HD78788 strain  
360 (FIG 4A). The use of lower infectious doses with HD78788 virus was supported by its higher  
361 pathogenicity resulting from mouse adaptation. The consistency between these two experiments  
362 suggest that the large phenotypic diversity we have reported should apply to most ZIKV strains.

363 Overall, brain viral load and brain pathology after IP infection were consistent with peak  
364 plasma viral load. In CC mice, the most notable microscopic lesions included signs of  
365 neuroinflammation evidenced by Iba1 immunohistochemistry. Neuroinflammation was similar in  
366 129-*Ifnar1*, CC005 and CC071 mice. These changes were less pronounced than in a previous

367 study which reported more severe CNS lesions in MAR1-5A3-treated B6 mice (31), infected  
368 with a more virulent African lineage ZIKV strain. The variable severity of lesions observed in  
369 CC mice, ranging from very mild abnormalities in CC001, to inflammatory lesions with  
370 perivascular cuffing, activation of microglial cells and microglial nodules in CC005, indicates  
371 that the genetic background also controls ZIKV neuropathogenesis.

372 The less severe histological lesions observed in CC mice compared with 129-*Ifnar1* mice  
373 could be due to the limited access to the brain of the virus or of the mAb which does not  
374 appreciably cross the blood-brain barrier (29). Therefore, intracerebral infection aimed at  
375 comparing brain lesions between strains while controlling the amount of virus effectively  
376 delivered. Surprisingly, CC001 and CC005 mice showed similar types and severity of lesions  
377 (although not all CC001 mice showed lesions) while CC071 mice developed much more severe  
378 signs of leptomeningo-encephalitis with massive neuroinflammation, similar to those of 129-  
379 *Ifnar1* mice. This last result suggests that the milder lesions observed in CC071 compared with  
380 129-*Ifnar1* mice after IP infection were likely due to reduced viral dissemination to the brain.  
381 Importantly, mice did not receive prior mAb treatment, allowing for the development of local  
382 and systemic antiviral responses. These results emphasize the complex interplay between  
383 infected cells and effectors of the immune response, which likely differs between CC strains  
384 under the control of host genes.

385 Viral replication rate between resistant CC001 and highly susceptible CC071 mice was  
386 investigated as a plausible mechanism for the differences in susceptibility between these two  
387 strains. MEFs are a semi-permanent source of cells which have been extensively used to assess  
388 viral replication (73, 74) including with ZIKV (75, 76). Although not the primary target of ZIKV  
389 infection, macrophages are also a relevant cell type to investigate ZIKV replication and innate  
390 responses (77). Mouse peritoneal macrophages are more easily recovered than MEFs (78)

391 although they can only be used as a primary culture. Finally, primary cultured neurons are of  
392 particular relevance considering ZIKV tropism for neural progenitors (63). Although the kinetics  
393 of viral replication were different between cell types, with a swift drop in CC001 macrophages at  
394 48h while it was slower in CC001 MEFs and primary neurons, replication steadily increased  
395 over time in all three cell types of CC071 origin, leading to significantly higher viral titers at  
396 72h. Our data is consistent with the observation by Caires-Junior et al. who reported increased  
397 ZIKV replication rate in iPS-derived neuroprogenitor cells from CZS-affected babies compared  
398 with their unaffected dizygotic twin (13). Therefore, our results strongly suggest that increased  
399 replication rate in CC071 compared with CC001 likely contributes to its higher plasma and brain  
400 viral loads and to its higher overall susceptibility to ZIKV.

401 Investigating the genetic diversity of a large number of CC strains has significantly extended  
402 the range of phenotypes induced by ZIKV infection in mice and better model the heterogeneity  
403 of the human population. It has allowed testing important factors such as mouse gender and the  
404 method of viral load measurement across multiple host genetic background, providing robust  
405 conclusions (37). Importantly, we found no differences between male and female mice in their  
406 susceptibility to ZIKV disease, nor in the peak viral load (FIG 2E). We also found a high  
407 correlation between viral loads measured by titration and by qRT-PCR over a 2  $\log_{10}$  range (FIG  
408 2D). This is in contrast with a study on Ebola virus which showed that, in spleen and liver, the  
409 susceptible mice produced similar amounts of viral genomes but 1 to 2  $\log_{10}$  more infectious  
410 virions than the resistant mice (43).

411 Genetic diversity also allowed us to assess correlations between traits, which cannot be  
412 achieved in a single strain. We showed that brain viral load was consistent with plasma viral  
413 load, but that plasma viral loads at days 2 and 6 p.i. were only moderately correlated. Likewise,  
414 we found that clinical severity did not correlate with the intensity of brain histological lesions

415 and neuroinflammation, as summarized in Table 1. These dissociations between phenotypes  
416 provide evidence for partly distinct mechanisms and genetic control (37) and result in distinct  
417 mouse models.

418 A recent study has reported strain-dependent variations in the long-term neuropathological  
419 and behavioral consequences of ZIKV infection after neonatal infection between four mouse  
420 inbred strains known to differ in their susceptibility to pathogens (36). Since they are all  
421 laboratory strains, they do not cover the same genetic variation as in our study and it is likely that  
422 even more diverse phenotypes would be observed in this model with the CC panel.

423 Genetic analysis of our results strongly suggests that, by contrast with other viruses for  
424 which major host genetic determinants have been identified (e.g. *Oas1b* for WNV (60) or *Mx1*  
425 for influenza virus (79)), susceptibility to ZIKV in CC strains is under polygenic control. This is  
426 supported by the continuous distributions of peak plasma viral load (FIG 3B) and of the rate of  
427 viral decrease (FIG 3C), and by the absence of any regions of the genome significantly  
428 associated with variations in viral load (FIG 5). Calculations based on CC genotypes show that,  
429 with 35 strains and an average of 5 mice per strain, we had 80% power of detecting a bi-allelic  
430 QTL explaining 30% or more of the phenotypic variance (80). This clearly rules out the  
431 possibility that the phenotypic variations measured across CC strains were controlled by one or  
432 few genes with major effects, as observed with *Oas1b* for WNV (47). Dissecting the genetic  
433 architecture of resistance and susceptibility to ZIKV in these strains will require dedicated  
434 intercrosses (72).

435 *Oas1b* is an interferon-stimulated gene and a major determinant of mouse susceptibility to  
436 WNV (45). A variant in OAS3, a member of the human homologous gene family, has been  
437 associated with increased severity of dengue (81). Most laboratory strains, including five of the  
438 eight CC founders, carry the same non-functional allele of *Oas1b* which renders them susceptible

439 to WNV infection (60), while the three wild-derived CC founders carry polymorphic but  
440 functional alleles and are resistant (45). CC strains therefore carry either functional or non-  
441 functional *Oas1b* alleles. Our results provide multiple lines of evidence to rule out a significant  
442 role of *Oas1b* in the variations of susceptibility to ZIKV across CC strains. First, since mAb-  
443 mediated blockade of type I IFN response likely inhibits temporarily *Oas1b* induction, *Oas1b*  
444 allele is unlikely to explain differences in peak viral load at day 2 p.i. Moreover, our QTL  
445 mapping analysis showed that mouse genotype at *Oas1b* (located on distal chromosome 5) did  
446 not significantly contribute to variations in viral load at day 2 or day 6 p.i., or in the rate of viral  
447 load decrease (FIG 5). Finally, since both CC001, CC005 and CC071 strains carry the *Oas1b*  
448 deficient allele (<http://csbio.unc.edu/CCstatus/CCGenomes/>), their differences in clinical  
449 severity, brain pathology and replication rate in infected cells must be controlled by other genetic  
450 variants. Interestingly, the large difference of survival time after WNV infection between CC071  
451 and CC001 or CC005 provides ideal strain combinations to identify novel genes controlling  
452 susceptibility to this virus.

453 Out of this large series of CC strains, we identified several new mouse models of ZIKV  
454 disease. CC071 mice were the most susceptible to ZIKV infection, more than mAb-treated B6  
455 mice (FIG 3A,B). mAb treatment was required to achieve high circulating viral load (FIG 2B),  
456 showing that CC071 has functional type I IFN response. CC071 mice were also very susceptible  
457 to DENV and WNV, two flaviviruses related to ZIKV. However, they are not uniformly  
458 susceptible to infectious agents since they showed susceptibility to RVFV similar to that of  
459 BALB/c, CC001 and CC005 mice, and intermediate susceptibility to *Salmonella* Typhimurium  
460 (52). Together with other susceptible strains like CC021 and CC026 which developed symptoms,  
461 or CC005 which developed severe brain lesions, CC071 will help identifying mechanisms of  
462 severe ZIKV infection and their genetic control. By contrast, CC001 mice were highly resistant,

463 even to a strongly pathogenic African ZIKV strain, despite blockade of type I IFN signaling.  
464 Extensive analysis of these CC strains with extreme phenotypes may elucidate how genetic  
465 variants affect susceptibility as well as innate and adaptive immune responses to flaviviral  
466 infection (72) and provide deeper understanding of the pathophysiology of severe complications  
467 of human ZIKV disease.  
468

469 **MATERIALS AND METHODS**

470

471 **Mice**

472 All Collaborative Cross (CC) mice (purchased from the Systems Genetics Core Facility,  
473 University of North Carolina and bred at the Institut Pasteur) (82), C57BL/6J mice (purchased  
474 from Charles River Laboratories France), BALB/cByJ and *Ifnar1* knock-out mice (*Ifnar1<sup>tm1Agt</sup>*  
475 allele on 129S2/SvPas or C57BL/6J background, designated 129-*Ifnar1* and B6-*Ifnar1*,  
476 respectively, and bred at the Institut Pasteur) were maintained under SPF conditions with 14:10  
477 light-dark cycle and *ad libitum* food and water in the Institut Pasteur animal facility. In all  
478 experiments, mice were killed by cervical dislocation. All experimental protocols were approved  
479 by the Institut Pasteur Ethics Committee (projects #2013-0071, #2014-0070, #2016-0013, #2016-  
480 0018 and dap190107) and authorized by the French Ministry of Research (decisions #00762.02,  
481 #7822, #6463, #6466 and #19469, respectively), in compliance with French and European  
482 regulations.

483

484 **Cell lines**

485 Vero cells (ATCC CRL-1586) were cultured at 37°C in Dulbecco's Modified Eagle Medium  
486 (DMEM, Gibco) supplemented with 10% fetal bovine serum (FBS, Eurobio). C6/36 cells (ATCC  
487 CRL-1660) were cultured at 28°C in Leibovitz Medium (L-15 Medium, Gibco) supplemented with  
488 10% FBS, 1% Non-Essential Amino Acids (Life Technologies) and 1% Tryptose Phosphate Broth  
489 (Life Technologies).

490



## 491 **Viruses**

492 The FG15 Asian Zika virus (ZIKV) strain, isolated from a patient during ZIKV outbreak in  
493 French Guiana in December 2015, was obtained from the Virology Laboratory of the Institut  
494 Pasteur of French Guiana. The HD78788 African ZIKV strain, isolated from a human case in  
495 Senegal in 1991, was obtained from the Institut Pasteur collection. The KDH0026A DENV  
496 serotype 1 (DENV-1) strain, isolated from a patient in Thailand in 2010, was previously described  
497 (83). Viral stocks were prepared from supernatant of infected C6/36 cells, clarified by  
498 centrifugation at 800g and titrated on Vero cells by focus-forming assay (FFA). Stocks were kept  
499 at -80°C. The West Nile virus (WNV) strain IS-98-ST1 (or Stork/98) was obtained, cultured and  
500 used as described in Mashimo *et al.* (60). The Rift Valley Fever virus (RVFV) strain ZH548 was  
501 obtained, cultured and used as described in Tokuda *et al.* (84).

502

## 503 **Mouse experiments**

504 All infection experiments were performed in a biosafety level 3 animal facility. Mice were  
505 maintained in isolators.

506 ZIKV and DENV systemic infection. CC mice received 2 mg of IFNAR-blocking mouse mAb  
507 (MAR1-5A3, BioXCell) by intraperitoneal (IP) injection one day before ZIKV or DENV infection  
508 (85). Groups of 6-8 week-old mice were inoculated IP with  $10^7$  focus-forming units (FFUs) of  
509 ZIKV FG15 or  $10^3$  FFUs of ZIKV HD78788, in 200 $\mu$ L PBS. For DENV infection, mice were  
510 anesthetized by IP injection with a solution of Xylazine (5 mg/kg) and Ketamine (80 mg/kg) and  
511 afterwards inoculated by intravenous (IV) injection in the retro-orbital sinus with  $2 \cdot 10^6$  FFUs of  
512 DENV-1 KDH0026A, in 100 $\mu$ L PBS. Survival and clinical signs were monitored daily for up to  
513 14 days. Clinical signs were scored as follows: 0, no symptom; 1, ruffled fur; 2, emaciation,  
514 hunched posture and/or hypo activity; 3, hind limb weakness, prostration and/or closed eyes; 4,

515 moribund or dead. Blood samples were collected at several time points from the retromandibular  
516 vein for plasma viral load assessment.

517 ZIKV intracerebral infection. Mice were anesthetized by IP injection with a solution of  
518 Xylazine (5 mg/kg), Ketamine (75 mg/kg) and Buprenorphine (0.03 mg/kg). Groups of 5-6 week-  
519 old mice were then inoculated by intracerebral (IC) injection in the right brain hemisphere with a  
520 26-gauge needle affixed to a Hamilton syringe sheathed by a wire guard allowing no more than a  
521 4-mm penetrance into the skull cavity, as described in (86). Mice received either  $10^5$  FFUs of  
522 ZIKV FG15 in PBS or PBS alone, in a volume of 10 $\mu$ L. Survival and clinical signs were monitored  
523 daily for 6 days and euthanized for brain collection. Another cohort of mice (n=7-8 per strain) was  
524 infected similarly and monitored daily for 21 days to assess symptoms and survival.

525 WNV and RVFV infection. Groups of 8-12 week-old mice were inoculated IP with  $10^3$  FFUs  
526 of WNV strain IS-98-ST1 or  $10^2$  PFUs of RVFV strain ZH548. Survival and clinical signs were  
527 monitored daily for up to 14 days (RVFV) or 21 days (WNV).

528

### 529 **Mouse embryonic fibroblasts (MEFs) isolation and infection**

530 MEFs were isolated from fetuses at day 13.5-14.5 of gestation, and cultured in DMEM  
531 supplemented with 10% FBS (Eurobio) and 1% penicillin/streptomycin (Gibco) at 37°C. MEFs  
532 were used until passage 2.

533 MEFs were plated at identical densities in culture dishes 24 hours before infection. MEFs  
534 were infected with ZIKV FG15 strain at a MOI of 5. After 2 hours of incubation at 37°C, the  
535 inoculum was replaced with fresh medium. Supernatants were collected at 24, 48 and 72 hours  
536 post-infection. Titration was performed by FFA in Vero cells.

537

### 538 **Mouse peritoneal macrophages (PMs) isolation and infection**

539 Ten week-old mice were killed and PMs were collected by peritoneal lavage with 5 mL PBS  
540 (Gibco). The cell suspension was filtered on a 100 µm cell strainer and centrifuged at 800g for 10  
541 minutes at 4°C. The cell pellet was re-suspended in serum-free RPMI 1640 medium (Gibco) and  
542 cells were plated in 96-well plates at desired density. After 1 hour incubation at 37°C, non-adherent  
543 cells were removed by 2 washes with PBS and fresh RPMI 1640 medium supplemented with 10%  
544 FBS and 1% penicillin/streptomycin was added to adherent cells.

545 Twenty-four hours after seeding, PMs were infected with ZIKV FG15 strain at a MOI of 5.  
546 After 2 hours of incubation at 37°C, the inoculum was replaced with fresh medium. Supernatants  
547 were collected at 24, 48 and 72 hours post-infection. Titration was performed by FFA in Vero  
548 cells.

549

#### 550 **Mouse primary neurons isolation and infection**

551 Primary neurons were prepared from mouse fetuses at day 16.5 of gestation. Isolated cortices  
552 were rinsed in HBSS medium (Gibco) and digested with 1 mg/mL Trypsin-EDTA (Gibco) and 0.5  
553 mg/mL DNase I (Merck) in HBSS medium for 15 minutes at 37°C. B-27 supplement (Life  
554 Technologies) was added to inactivate Trypsin and mechanical dissociation of the cortices was  
555 performed by passages through a narrowed glass pipet. The cell suspension was centrifuged for 10  
556 minutes at 200g and cell pellet was re-suspended in Neurobasal medium (Gibco) supplemented  
557 with 2% B-27, 0.2% L-glutamine (Gibco) and 1% penicillin-streptomycin-fungizone (Life  
558 Technologies). Cells were plated at identical densities in culture plates pre-coated with polyD-  
559 lysine (Merck) and Laminin (Merck).

560 Primary cultured neurons were infected with ZIKV FG15 strain at a MOI of 5 at 12 days of  
561 *in vitro* culture, for network maturation. After 2 hours of incubation at 37°C, the inoculum was

562 replaced with fresh medium. Supernatants were collected at 24, 48 and 72 hours post-infection.  
563 Titration was performed by FFA in Vero cells.

564

### 565 **Focus-forming assay**

566 Vero cells were seeded at  $3 \cdot 10^4$  per well in 100  $\mu$ l complete medium (DMEM, FBS 10%) in  
567 96-well plates. After overnight incubation at 37°C, medium was replaced with 40  $\mu$ L of serial 10-  
568 fold dilutions of the samples, and 115  $\mu$ L of methylcellulose overlay was added 2 hours later. After  
569 40 hours incubation, culture medium was removed and cells were fixed with 100  $\mu$ L/well of 4%  
570 paraformaldehyde for 20 minutes and permeabilized with a solution of 0.3% Triton and 5% FBS  
571 in PBS for 20 minutes. Cells were washed, incubated with a mouse mAb directed against ZIKV  
572 envelop protein (4G2, purified from the ATCC hybridoma) for 1 hour at 37°C (1/250° in blocking  
573 buffer). Cells were further washed, incubated with secondary antibody (AlexaFluor-488-  
574 conjugated anti-mouse IgG, Invitrogen) for 45 minutes at 37°C and washed. Infected cell foci were  
575 counted using an ImmunoSpot CTL analyzer and viral titers were calculated from the average  
576 number of foci.

577

### 578 **Viral genome quantification by RT-qPCR**

579 Blood samples were centrifuged to recover plasma from which viral RNA was extracted with  
580 the QIAamp Viral RNA Mini Kit (Qiagen). Brain samples were homogenized at 4°C in 1 mL of  
581 TRIzol reagent (Life Technologies) using ceramic beads and automated homogenizer (PreCellys).  
582 Total RNA was extracted according to manufacturer's instructions. cDNA synthesis was  
583 performed using MMLV reverse transcriptase (Life Technologies) in a Bio-Rad *Mycycler*  
584 thermocycler. ZIKV and DENV cDNA were quantified by TaqMan quantitative PCR (qPCR) in  
585 a ViiA7 Instrument (Life Technologies) using standard cycling conditions. Primer sets adapted

586 from previous works (87-89) were used to detect ZIKV and DENV RNA. ZIKV FG15 : forward,  
587 5'-CCG CTG CCC AAC ACA AG- 3'; reverse, 5'-CCA CTA ACG TTC TTT TGC AGA CAT-  
588 3'; probe, 5'-6FAM-AGC CTA CCT TGA CAA GCA ATC AGA CAC TCA A-MGB- 3' (Life  
589 Technologies). ZIKV HD78788: forward, 5'-AAA TAC ACA TAC CAA AAC AAA GTG GT-  
590 3'; reverse, 5' -TCC ACT CCC TCT CTG GTC TTG- 3'; probe, 5'-6FAM-CTC AGA CCA GCT  
591 GAA G-MGB- 3' (Life Technologies). DENV-1 KDH0026A: forward, 5' -GGA AGG AGA  
592 AGG ACT CCA CA- 3'; reverse, 5'- ATC CTT GTA TCC CAT CCG GCT- 3'; probe, 5' -6FAM  
593 CTC AGA GAC ATA TCA AAG ATT CCA GGG-MGB- 3' (Life Technologies). Viral load is  
594 expressed on a Log<sub>10</sub> scale as viral genome copies per milliliter (plasma samples) or per total RNA  
595 microgram (brain samples) after comparison with a standard curve produced using serial 10-fold  
596 dilutions of a plasmid containing the corresponding fragment of ZIKV genome.

597

### 598 **Western Blot analysis**

599 MEFs (5.10<sup>6</sup>) were pre-incubated with IFNAR1-blocking antibody (MAR1-5A3, BioXCell)  
600 for 7 hours and then stimulated, or not, with 300 IU/mL mouse IFN- $\alpha$  (Miltenyi Biotec) for 15  
601 minutes. MEFs were detached and centrifuged at 300xg for 5 minutes and cell pellet was re-  
602 suspended in cold PBS. MEFs were then lysed into extraction buffer (10 mM Tris-HCl, pH 7.5, 5  
603 mM EDTA, 150 mM NaCl, 1% NP40, 10% glycerol, 30 mM NaP, 50 mM NaFluoride) completed  
604 with protease inhibitor (Complete, EDTA free, Roche) and phosphatase inhibitors (phosStop easy  
605 pack, Roche) with 2.5 UI of benzonase nuclease (Sigma). Lysates were incubated on ice for 30  
606 minutes and non-soluble fraction was separated by centrifugation. Protein concentrations were  
607 determined by Bradford assay, and equal amounts of protein were further used. Protein  
608 denaturation was performed in Laemmli buffer at 95°C for 5 minutes. After separation on a 12%  
609 polyacrylamide gel (Biorad), proteins were transferred on Immun-Blot polyvinylidene difluoride

610 (PVDF) membrane (Biorad) and incubated overnight with the following antibodies: Anti-  
611 Phospho-Stat1 Tyr701 (1/1,000<sup>e</sup>, #9167, Cell Signaling), Anti-Total Stat1 N-terminus (1/500<sup>e</sup>, #  
612 610115, BD Biosciences), Anti- $\alpha$ Tubulin (1/8,000<sup>e</sup>, # T5168, Merck). Membranes were incubated  
613 for 1.5 hour at room temperature with an anti-mouse or an anti-rabbit IgG horseradish peroxidase-  
614 linked secondary antibody (1/10,000<sup>e</sup>, NA931 and NA934V, Amersham) and signals were  
615 visualized using autoradiography.

616

### 617 **Histopathology**

618 After necropsy, brain was removed, fixed for 48-72 hours in 10% neutral-buffered formalin  
619 and embedded in paraffin; 4 $\mu$ m-thick sections were stained in hematoxylin-eosin. Morphology of  
620 microglial cells was assessed by immunohistochemistry using rabbit anti-Iba1 primary antibody  
621 (# 01919741, Wako chemical, dilution 1:50) as previously described (90). Sections were analyzed  
622 by a trained veterinary pathologist in a blind study on coded slides.

623

### 624 **Genetic analysis**

625 Broad sense heritability was calculated as previously described (59).

626 Plasma viral load at days 2 and 6 p.i. and plasma viral load decrease, measured on 159 mice  
627 from 35 CC strains (average of 4.5 mice per strain), were used in quantitative trait locus (QTL)  
628 mapping using the *rqtl2* R package (91) and GigaMUGA genotypes of CC founders and CC strains  
629 available from <http://csbio.unc.edu/CCstatus/CCGenomes/#genotypes>. Genome scan was  
630 performed using the *scan1* function with a linear mixed model using a kinship matrix. Statistical  
631 significance levels were calculated from 1,000 permutations.

632 Genotype-phenotype associations for specific genes (*Ifnar1*, *Oas1b*) were tested by Kruskal-  
633 Wallis test using the founder haplotype as the genotype.

634

## 635 **Statistical analysis**

636 Statistical analyses were performed using R software (v3.5.2). Kaplan-Meier survival curves  
637 were compared by logrank test. Two-way ANOVA was used for testing mouse strain and sex  
638 effects on plasma viral load at day 2 p.i. (FIG 2E). Student's *t*-test was used to compare viral loads  
639 in tissues, except when data showed heterogeneous variance between groups, in which case we  
640 used Kruskal-Wallis and Wilcoxon non-parametric tests. These tests were also used for assessing  
641 mouse strain effect on plasma viral load and on plasma viral load decrease (FIG 3). Pearson's  
642 coefficient was used for the correlation between plasma viral load at days 2 and 6 p.i. (FIG 3B)  
643 and for the correlation between measurements of plasma viral load by FFA and RT-qPCR (FIG  
644 2D). Student's *t*-test was used to compare viral titers between strains in *in vitro* experiments. P-  
645 values < 0.05 were considered statistically significant.

646

647

## 648 **NOTES**

649 We are grateful to the Virology Laboratory of the Institut Pasteur of French Guyana  
650 (National Reference Center for Arboviruses) for providing the FG15 ZIKV strain and Valérie  
651 Choumet for providing the IS-98-ST1 WNV strain. We thank Thérèse Couderc and Claude  
652 Ruffié for providing B6-*Ifnar1* and 129-*Ifnar1* mice, Laurine Conquet, Laetitia Joullié and  
653 Marion Doladilhe for technical help, Magali Tichit for histopathology techniques, Isabelle  
654 Lanctin and Jérôme Le Boydre for careful breeding of CC mice, and the animal facility staff for  
655 animal care in biocontainment units (DTPS-C2RA-Central Animal Facility platform). We are  
656 grateful to Jean Jaubert, Michel Cohen-Tannoudji and Aurore Vidy-Roche for useful discussions  
657 throughout the project, and to Rachel Maede for editorial suggestions.

658           The authors declare no competing interests.

659           This work was supported by a grant from the French Government's Investissement d'Avenir  
660 program, Laboratoire d'Excellence "Integrative Biology of Emerging Infectious Diseases" (grant  
661 n°ANR-10-LABX-62-IBEID). C.M. was supported by a fellowship from the grant n°ANR-10-  
662 LABX-62-IBEID.

663



664 **REFERENCES**

- 665 1. **Petersen LR, Jamieson DJ, Powers AM, Honein MA.** 2016. Zika Virus. *N Engl J Med*  
666 **374**:1552-1563.
- 667 2. **Talero-Gutierrez C, Rivera-Molina A, Perez-Pavajeau C, Ossa-Ospina I, Santos-**  
668 **Garcia C, Rojas-Anaya MC, de-la-Torre A.** 2018. Zika virus epidemiology: from  
669 Uganda to world pandemic, an update. *Epidemiol Infect*  
670 doi:10.1017/s0950268818000419:1-7.
- 671 3. **Cao-Lormeau VM, Blake A, Mons S, Lastere S, Roche C, Vanhomwegen J, Dub T,**  
672 **Baudouin L, Teissier A, Larre P, Vial AL, Decam C, Choumet V, Halstead SK,**  
673 **Willison HJ, Musset L, Manuguerra JC, Despres P, Fournier E, Mallet HP, Musso**  
674 **D, Fontanet A, Neil J, Ghawche F.** 2016. Guillain-Barre Syndrome outbreak associated  
675 with Zika virus infection in French Polynesia: a case-control study. *Lancet* **387**:1531-  
676 1539.
- 677 4. **Munoz LS, Parra B, Pardo CA.** 2017. Neurological Implications of Zika Virus  
678 Infection in Adults. *J Infect Dis* **216**:S897-s905.
- 679 5. **Rasmussen SA, Jamieson DJ, Honein MA, Petersen LR.** 2016. Zika Virus and Birth  
680 Defects--Reviewing the Evidence for Causality. *N Engl J Med* **374**:1981-1987.
- 681 6. **Sanz Cortes M, Rivera AM, Yopez M, Guimaraes CV, Diaz Yunes I, Zarutskie A,**  
682 **Davila I, Shetty A, Mahadev A, Serrano SM, Castillo N, Lee W, Valentine G, Belfort**  
683 **M, Parra G, Mohila C, Aagaard K, Parra M.** 2018. Clinical Assessment and Brain  
684 Findings in a Cohort of Mothers, Fetuses and Infants Infected with Zika Virus. *Am J*  
685 *Obstet Gynecol* doi:10.1016/j.ajog.2018.01.012.
- 686 7. **Xia H, Luo H, Shan C, Muruato AE, Nunes BT, Medeiros DBA, Zou J, Xie X,**  
687 **Giraldo MI, Vasconcelos PFC, Weaver SC, Wang T, Rajsbaum R, Shi PY.** 2018. An

- 688 evolutionary NS1 mutation enhances Zika virus evasion of host interferon induction. *Nat*  
689 *Commun* **9**:414.
- 690 8. **Liu Y, Liu J, Du S, Shan C, Nie K, Zhang R, Li XF, Zhang R, Wang T, Qin CF,**  
691 **Wang P, Shi PY, Cheng G.** 2017. Evolutionary enhancement of Zika virus infectivity in  
692 *Aedes aegypti* mosquitoes. *Nature* **545**:482-486.
- 693 9. **Flamand C, Fritzell C, Matheus S, Dueymes M, Carles G, Favre A, Enfissi A, Adde**  
694 **A, Demar M, Kazanji M, Cauchemez S, Rousset D.** 2017. The proportion of  
695 asymptomatic infections and spectrum of disease among pregnant women infected by  
696 Zika virus: systematic monitoring in French Guiana, 2016. *Euro Surveill* **22**.
- 697 10. **Cauchemez S, Besnard M, Bompard P, Dub T, Guillemette-Artur P, Eyrolle-**  
698 **Guignot D, Salje H, Van Kerkhove MD, Abadie V, Garel C, Fontanet A, Mallet HP.**  
699 2016. Association between Zika virus and microcephaly in French Polynesia, 2013-15: a  
700 retrospective study. *Lancet* **387**:2125-2132.
- 701 11. **Brasil P, Pereira JP, Jr., Moreira ME, Ribeiro Nogueira RM, Damasceno L,**  
702 **Wakimoto M, Rabello RS, Valderramos SG, Halai UA, Salles TS, Zin AA, Horovitz**  
703 **D, Daltro P, Boechat M, Raja Gabaglia C, Carvalho de Sequeira P, Pilotto JH,**  
704 **Medialdea-Carrera R, Cotrim da Cunha D, Abreu de Carvalho LM, Pone M,**  
705 **Machado Siqueira A, Calvet GA, Rodrigues Baiao AE, Neves ES, Nassar de**  
706 **Carvalho PR, Hasue RH, Marschik PB, Einspieler C, Janzen C, Cherry JD, Bispo**  
707 **de Filippis AM, Nielsen-Saines K.** 2016. Zika Virus Infection in Pregnant Women in  
708 Rio de Janeiro. *N Engl J Med* **375**:2321-2334.
- 709 12. **McGrath EL, Rossi SL, Gao J, Widen SG, Grant AC, Dunn TJ, Azar SR, Roundy**  
710 **CM, Xiong Y, Prusak DJ, Loucas BD, Wood TG, Yu Y, Fernandez-Salas I, Weaver**

- 711 **SC, Vasilakis N, Wu P.** 2017. Differential Responses of Human Fetal Brain Neural Stem  
712 Cells to Zika Virus Infection. *Stem Cell Reports* doi:10.1016/j.stemcr.2017.01.008.
- 713 13. **Caires-Junior LC, Goulart E, Melo US, Araujo BSH, Alvizi L, Soares-Schanoski A,**  
714 **de Oliveira DF, Kobayashi GS, Griesi-Oliveira K, Musso CM, Amaral MS, daSilva**  
715 **LF, Astray RM, Suarez-Patino SF, Ventini DC, Gomes da Silva S, Yamamoto GL,**  
716 **Ezquina S, Naslavsky MS, Telles-Silva KA, Weinmann K, van der Linden V, van**  
717 **der Linden H, de Oliveira JMR, Arrais NRM, Melo A, Figueiredo T, Santos S,**  
718 **Meira JCG, Passos SD, de Almeida RP, Bispo AJB, Cavalheiro EA, Kalil J, Cunha-**  
719 **Neto E, Nakaya H, Andreato-Santos R, de Souza Ferreira LC, Verjovski-Almeida S,**  
720 **Ho PL, Passos-Bueno MR, Zatz M.** 2018. Discordant congenital Zika syndrome twins  
721 show differential in vitro viral susceptibility of neural progenitor cells. *Nat Commun*  
722 **9:475.**
- 723 14. **Julander JG, Siddharthan V.** 2017. Small-Animal Models of Zika Virus. *J Infect Dis*  
724 **216:S919-s927.**
- 725 15. **Winkler CW, Peterson KE.** 2017. Using immunocompromised mice to identify  
726 mechanisms of Zika virus transmission and pathogenesis. *Immunology*  
727 doi:10.1111/imm.12883.
- 728 16. **Li H, Saucedo-Cuevas L, Regla-Nava JA, Chai G, Sheets N, Tang W, Terskikh AV,**  
729 **Shresta S, Gleeson JG.** 2016. Zika Virus Infects Neural Progenitors in the Adult Mouse  
730 Brain and Alters Proliferation. *Cell Stem Cell* doi:10.1016/j.stem.2016.08.005.
- 731 17. **Rosenfeld AB, Doobin DJ, Warren AL, Racaniello VR, Vallee RB.** 2017. Replication  
732 of early and recent Zika virus isolates throughout mouse brain development. *Proc Natl*  
733 *Acad Sci U S A* doi:10.1073/pnas.1714624114.

- 734 18. **Tang WW, Young MP, Mamidi A, Regla-Nava JA, Kim K, Shrestha S.** 2016. A  
735 Mouse Model of Zika Virus Sexual Transmission and Vaginal Viral Replication. *Cell*  
736 *Rep* **17**:3091-3098.
- 737 19. **Duggal NK, McDonald EM, Ritter JM, Brault AC.** 2018. Sexual transmission of Zika  
738 virus enhances in utero transmission in a mouse model. *Sci Rep* **8**:4510.
- 739 20. **Winkler CW, Woods TA, Rosenke R, Scott DP, Best SM, Peterson KE.** 2017. Sexual  
740 and Vertical Transmission of Zika Virus in anti-interferon receptor-treated Rag1-  
741 deficient mice. *Sci Rep* **7**:7176.
- 742 21. **Jaeger AS, Murrieta RA, Goren LR, Crooks CM, Moriarty RV, Weiler AM,**  
743 **Rybarczyk S, Semler MR, Huffman C, Mejia A, Simmons HA, Fritsch M, Osorio**  
744 **JE, Eickhoff JC, O'Connor SL, Ebel GD, Friedrich TC, Aliota MT.** 2019. Zika  
745 viruses of African and Asian lineages cause fetal harm in a mouse model of vertical  
746 transmission. *PLoS Negl Trop Dis* **13**:e0007343.
- 747 22. **Yockey LJ, Varela L, Rakib T, Khoury-Hanold W, Fink SL, Stutz B, Szigeti-Buck**  
748 **K, Van den Pol A, Lindenbach BD, Horvath TL, Iwasaki A.** 2016. Vaginal Exposure  
749 to Zika Virus during Pregnancy Leads to Fetal Brain Infection. *Cell* **166**:1247-  
750 1256.e1244.
- 751 23. **Miner JJ, Cao B, Govero J, Smith AM, Fernandez E, Cabrera OH, Garber C, Noll**  
752 **M, Klein RS, Noguchi KK, Mysorekar IU, Diamond MS.** 2016. Zika Virus Infection  
753 during Pregnancy in Mice Causes Placental Damage and Fetal Demise. *Cell* **165**:1081-  
754 1091.
- 755 24. **Paul AM, Acharya D, Neupane B, Thompson EA, Gonzalez-Fernandez G, Copeland**  
756 **KM, Garrett M, Liu H, Lopez ME, de Cruz M, Flynt A, Liao J, Guo YL, Gonzalez-**  
757 **Fernandez F, Vig PJS, Bai F.** 2018. Congenital Zika Virus Infection in

- 758 Immunocompetent Mice Causes Postnatal Growth Impediment and Neurobehavioral  
759 Deficits. *Front Microbiol* **9**:2028.
- 760 25. **Caine EA, Jagger BW, Diamond MS.** 2018. Animal Models of Zika Virus Infection  
761 during Pregnancy. *Viruses* **10**.
- 762 26. **Wu Y, Liu Q, Zhou J, Xie W, Chen C, Wang Z, Yang H, Cui J.** 2017. Zika virus  
763 evades interferon-mediated antiviral response through the co-operation of multiple  
764 nonstructural proteins in vitro. *Cell Discov* **3**:17006.
- 765 27. **Pierson TC, Diamond MS.** 2018. The emergence of Zika virus and its new clinical  
766 syndromes. *Nature* **560**:573-581.
- 767 28. **Grant A, Ponia SS, Tripathi S, Balasubramaniam V, Miorin L, Sourisseau M,**  
768 **Schwarz MC, Sanchez-Seco MP, Evans MJ, Best SM, Garcia-Sastre A.** 2016. Zika  
769 Virus Targets Human STAT2 to Inhibit Type I Interferon Signaling. *Cell Host Microbe*  
770 **19**:882-890.
- 771 29. **Lazear HM, Govero J, Smith AM, Platt DJ, Fernandez E, Miner JJ, Diamond MS.**  
772 2016. A Mouse Model of Zika Virus Pathogenesis. *Cell Host Microbe* **19**:720-730.
- 773 30. **Sheehan KC, Lai KS, Dunn GP, Bruce AT, Diamond MS, Heutel JD, Dungo-Arthur**  
774 **C, Carrero JA, White JM, Hertzog PJ, Schreiber RD.** 2006. Blocking monoclonal  
775 antibodies specific for mouse IFN-alpha/beta receptor subunit 1 (IFNAR-1) from mice  
776 immunized by in vivo hydrodynamic transfection. *J Interferon Cytokine Res* **26**:804-819.
- 777 31. **Smith DR, Hollidge B, Daye S, Zeng X, Blancett C, Kuszpit K, Bocan T, Koehler**  
778 **JW, Coyne S, Minogue T, Kenny T, Chi X, Yim S, Miller L, Schmaljohn C, Bavari**  
779 **S, Golden JW.** 2017. Neuropathogenesis of Zika Virus in a Highly Susceptible  
780 Immunocompetent Mouse Model after Antibody Blockade of Type I Interferon. *PLoS*  
781 *Negl Trop Dis* **11**:e0005296.

- 782 32. **Kamiyama N, Soma R, Hidano S, Watanabe K, Umekita H, Fukuda C, Noguchi K,**  
783 **Gendo Y, Ozaki T, Sonoda A, Sachi N, Runtuwene LR, Miura Y, Matsubara E,**  
784 **Tajima S, Takasaki T, Eshita Y, Kobayashi T.** 2017. Ribavirin inhibits Zika virus  
785 (ZIKV) replication in vitro and suppresses viremia in ZIKV-infected STAT1-deficient  
786 mice. *Antiviral Res* doi:10.1016/j.antiviral.2017.08.007.
- 787 33. **Jagger BW, Miner JJ, Cao B, Arora N, Smith AM, Kovacs A, Mysorekar IU, Coyne**  
788 **CB, Diamond MS.** 2017. Gestational Stage and IFN-lambda Signaling Regulate ZIKV  
789 Infection In Utero. *Cell Host Microbe* **22**:366-376.e363.
- 790 34. **Tripathi S, Balasubramaniam VR, Brown JA, Mena I, Grant A, Bardina SV,**  
791 **Maringer K, Schwarz MC, Maestre AM, Sourisseau M, Albrecht RA, Krammer F,**  
792 **Evans MJ, Fernandez-Sesma A, Lim JK, Garcia-Sastre A.** 2017. A novel Zika virus  
793 mouse model reveals strain specific differences in virus pathogenesis and host  
794 inflammatory immune responses. *PLoS Pathog* **13**:e1006258.
- 795 35. **Manet C, Roth C, Tawfik A, Cantaert T, Sakuntabhai A, Montagutelli X.** 2018. Host  
796 genetic control of mosquito-borne Flavivirus infections. *Mamm Genome*  
797 doi:10.1007/s00335-018-9775-2.
- 798 36. **Snyder-Keller A, Kramer L, Zink S, Bolivar VJ.** 2019. Mouse strain and sex-  
799 dependent differences in long-term behavioral abnormalities and neuropathologies after  
800 developmental zika infection. *J Neurosci* doi:10.1523/jneurosci.2666-18.2019.
- 801 37. **Saul MC, Philip VM, Reinholdt LG, Chesler EJ.** 2019. High-Diversity Mouse  
802 Populations for Complex Traits. *Trends in Genetics* doi:10.1016/j.tig.2019.04.003.
- 803 38. **Montagutelli X.** 2000. Effect of the genetic background on the phenotype of mouse  
804 mutations. *J Am Soc Nephrol* **11 Suppl 16**:S101-105.
- 805 39. **Nadeau JH.** 2001. Modifier genes in mice and humans. *Nat Rev Genet* **2**:165-174.

- 806 40. **Consortium.** 2012. The genome architecture of the Collaborative Cross mouse genetic  
807 reference population. *Genetics* **190**:389-401.
- 808 41. **Roberts A, Pardo-Manuel de Villena F, Wang W, McMillan L, Threadgill DW.**  
809 2007. The polymorphism architecture of mouse genetic resources elucidated using  
810 genome-wide resequencing data: implications for QTL discovery and systems genetics.  
811 *Mamm Genome* **18**:473-481.
- 812 42. **Keane TM, Goodstadt L, Danecek P, White MA, Wong K, Yalcin B, Heger A, Agam**  
813 **A, Slater G, Goodson M, Furlotte NA, Eskin E, Nellaker C, Whitley H, Cleak J,**  
814 **Janowitz D, Hernandez-Pliego P, Edwards A, Belgard TG, Oliver PL, McIntyre RE,**  
815 **Bhomra A, Nicod J, Gan X, Yuan W, van der Weyden L, Steward CA, Bala S,**  
816 **Stalker J, Mott R, Durbin R, Jackson IJ, Czechanski A, Guerra-Assuncao JA,**  
817 **Donahue LR, Reinholdt LG, Payseur BA, Ponting CP, Birney E, Flint J, Adams DJ.**  
818 2011. Mouse genomic variation and its effect on phenotypes and gene regulation. *Nature*  
819 **477**:289-294.
- 820 43. **Rasmussen AL, Okumura A, Ferris MT, Green R, Feldmann F, Kelly SM, Scott DP,**  
821 **Safronetz D, Haddock E, LaCasse R, Thomas MJ, Sova P, Carter VS, Weiss JM,**  
822 **Miller DR, Shaw GD, Korth MJ, Heise MT, Baric RS, de Villena FP, Feldmann H,**  
823 **Katze MG.** 2014. Host genetic diversity enables Ebola hemorrhagic fever pathogenesis  
824 and resistance. *Science* **346**:987-991.
- 825 44. **Gralinski LE, Ferris MT, Aylor DL, Whitmore AC, Green R, Frieman MB, Deming**  
826 **D, Menachery VD, Miller DR, Buus RJ, Bell TA, Churchill GA, Threadgill DW,**  
827 **Katze MG, McMillan L, Valdar W, Heise MT, Pardo-Manuel de Villena F, Baric**  
828 **RS.** 2015. Genome Wide Identification of SARS-CoV Susceptibility Loci Using the  
829 Collaborative Cross. *PLoS Genet* **11**:e1005504.

- 830 45. **Graham JB, Thomas S, Swarts J, McMillan AA, Ferris MT, Suthar MS, Treuting**  
831 **PM, Ireton R, Gale M, Jr., Lund JM.** 2015. Genetic diversity in the collaborative cross  
832 model recapitulates human West Nile virus disease outcomes. *MBio* **6**:e00493-00415.
- 833 46. **Graham JB, Swarts JL, Wilkins C, Thomas S, Green R, Sekine A, Voss KM, Ireton**  
834 **RC, Mooney M, Choonoo G, Miller DR, Treuting PM, Pardo Manuel de Villena F,**  
835 **Ferris MT, McWeeney S, Gale M, Jr., Lund JM.** 2016. A Mouse Model of Chronic  
836 West Nile Virus Disease. *PLoS Pathog* **12**:e1005996.
- 837 47. **Green R, Wilkins C, Thomas S, Sekine A, Hendrick DM, Voss K, Ireton RC,**  
838 **Mooney M, Go JT, Choonoo G, Jeng S, de Villena FP, Ferris MT, McWeeney S,**  
839 **Gale M, Jr.** 2017. Oas1b-dependent Immune Transcriptional Profiles of West Nile Virus  
840 Infection in the Collaborative Cross. *G3 (Bethesda)* **7**:1665-1682.
- 841 48. **Bottomly D, Ferris MT, Aicher LD, Rosenzweig E, Whitmore A, Aylor DL,**  
842 **Haagmans BL, Gralinski LE, Bradel-Tretheway BG, Bryan JT, Threadgill DW, de**  
843 **Villena FP, Baric RS, Katze MG, Heise M, McWeeney SK.** 2012. Expression  
844 quantitative trait Loci for extreme host response to influenza a in pre-collaborative cross  
845 mice. *G3 (Bethesda)* **2**:213-221.
- 846 49. **Elbahesh H, Schughart K.** 2016. Genetically diverse CC-founder mouse strains  
847 replicate the human influenza gene expression signature. *Sci Rep* **6**:26437.
- 848 50. **Ferris MT, Aylor DL, Bottomly D, Whitmore AC, Aicher LD, Bell TA, Bradel-**  
849 **Tretheway B, Bryan JT, Buus RJ, Gralinski LE, Haagmans BL, McMillan L, Miller**  
850 **DR, Rosenzweig E, Valdar W, Wang J, Churchill GA, Threadgill DW, McWeeney**  
851 **SK, Katze MG, Pardo-Manuel de Villena F, Baric RS, Heise MT.** 2013. Modeling  
852 host genetic regulation of influenza pathogenesis in the collaborative cross. *PLoS Pathog*  
853 **9**:e1003196.



- 854 51. **Lore NI, Iraqi FA, Bragonzi A.** 2015. Host genetic diversity influences the severity of  
855 *Pseudomonas aeruginosa* pneumonia in the Collaborative Cross mice. *BMC Genet*  
856 **16:106.**
- 857 52. **Zhang J, Malo D, Mott R, Panthier JJ, Montagutelli X, Jaubert J.** 2018.  
858 Identification of new loci involved in the host susceptibility to *Salmonella Typhimurium*  
859 in collaborative cross mice. *BMC Genomics* **19:303.**
- 860 53. **Durrant C, Tayem H, Yalcin B, Cleak J, Goodstadt L, de Villena FP, Mott R, Iraqi**  
861 **FA.** 2011. Collaborative Cross mice and their power to map host susceptibility to  
862 *Aspergillus fumigatus* infection. *Genome Res* **21:1239-1248.**
- 863 54. **Noll KE, Ferris MT, Heise MT.** 2019. The Collaborative Cross: A Systems Genetics  
864 Resource for Studying Host-Pathogen Interactions. *Cell Host Microbe* **25:484-498.**
- 865 55. **Rossi SL, Tesh RB, Azar SR, Muruato AE, Hanley KA, Auguste AJ, Langsjoen RM,**  
866 **Paessler S, Vasilakis N, Weaver SC.** 2016. Characterization of a Novel Murine Model  
867 to Study Zika Virus. *Am J Trop Med Hyg* **94:1362-1369.**
- 868 56. **Dowall SD, Graham VA, Rayner E, Hunter L, Atkinson B, Pearson G, Dennis M,**  
869 **Hewson R.** 2017. Lineage-dependent differences in the disease progression of Zika virus  
870 infection in type-I interferon receptor knockout (A129) mice. *PLoS Negl Trop Dis*  
871 **11:e0005704.**
- 872 57. **Srivastava A, Morgan AP, Najarian ML, Sarsani VK, Sigmon JS, Shorter JR,**  
873 **Kashfeen A, McMullan RC, Williams LH, Giusti-Rodriguez P, Ferris MT, Sullivan**  
874 **P, Hock P, Miller DR, Bell TA, McMillan L, Churchill GA, de Villena FP.** 2017.  
875 Genomes of the Mouse Collaborative Cross. *Genetics* **206:537-556.**

- 876 58. **Liang H, Yang R, Liu Z, Li M, Liu H, Jin X.** 2018. Recombinant Zika virus envelope  
877 protein elicited protective immunity against Zika virus in immunocompetent mice. *PLoS*  
878 *One* **13**:e0194860.
- 879 59. **Rutledge H, Aylor DL, Carpenter DE, Peck BC, Chines P, Ostrowski LE, Chesler**  
880 **EJ, Churchill GA, de Villena FP, Kelada SN.** 2014. Genetic regulation of Zfp30,  
881 CXCL1, and neutrophilic inflammation in murine lung. *Genetics* **198**:735-745.
- 882 60. **Mashimo T, Lucas M, Simon-Chazottes D, Frenkiel MP, Montagutelli X, Ceccaldi**  
883 **PE, Deubel V, Guenet JL, Despres P.** 2002. A nonsense mutation in the gene encoding  
884 2'-5'-oligoadenylate synthetase/L1 isoform is associated with West Nile virus  
885 susceptibility in laboratory mice. *Proc Natl Acad Sci U S A* **99**:11311-11316.
- 886 61. **Govero J, Esakky P, Scheaffer SM, Fernandez E, Drury A, Platt DJ, Gorman MJ,**  
887 **Richner JM, Caine EA, Salazar V, Moley KH, Diamond MS.** 2016. Zika virus  
888 infection damages the testes in mice. *Nature* **540**:438-442.
- 889 62. **Manangeeswaran M, Ireland DD, Verthelyi D.** 2016. Zika (PRVABC59) Infection Is  
890 Associated with T cell Infiltration and Neurodegeneration in CNS of Immunocompetent  
891 Neonatal C57Bl/6 Mice. *PLoS pathogens* **12**:e1006004.
- 892 63. **van den Pol AN, Mao G, Yang Y, Ornaghi S, Davis JN.** 2017. Zika Virus Targeting in  
893 the Developing Brain. *J Neurosci* **37**:2161-2175.
- 894 64. **Li S, Armstrong N, Zhao H, Hou W, Liu J, Chen C, Wan J, Wang W, Zhong C, Liu**  
895 **C, Zhu H, Xia N, Cheng T, Tang Q.** 2018. Zika Virus Fatally Infects Wild Type  
896 Neonatal Mice and Replicates in Central Nervous System. *Viruses* **10**.
- 897 65. **Gorman MJ, Caine EA, Zaitsev K, Begley MC, Weger-Lucarelli J, Uccellini MB,**  
898 **Tripathi S, Morrison J, Yount BL, Dinnon KH, 3rd, Ruckert C, Young MC, Zhu Z,**  
899 **Robertson SJ, McNally KL, Ye J, Cao B, Mysorekar IU, Ebel GD, Baric RS, Best**

- 900 **SM, Artyomov MN, Garcia-Sastre A, Diamond MS.** 2018. An Immunocompetent  
901 Mouse Model of Zika Virus Infection. *Cell Host Microbe* **23**:672-685.e676.
- 902 66. **Manet C, Roth C, Tawfik A, Cantaert T, Sakuntabhai A, Montagutelli X.** 2018. Host  
903 genetic control of mosquito-borne Flavivirus infections. *Mamm Genome* **29**:384-407.
- 904 67. **Samuel MA, Diamond MS.** 2005. Alpha/beta interferon protects against lethal West  
905 Nile virus infection by restricting cellular tropism and enhancing neuronal survival. *J*  
906 *Virol* **79**:13350-13361.
- 907 68. **Churchill GA, Airey DC, Allayee H, Angel JM, Attie AD, Beatty J, Beavis WD,**  
908 **Belknap JK, Bennett B, Berrettini W, Bleich A, Bogue M, Broman KW, Buck KJ,**  
909 **Buckler E, Burmeister M, Chesler EJ, Cheverud JM, Clapcote S, Cook MN, Cox**  
910 **RD, Crabbe JC, Crusio WE, Darvasi A, Deschepper CF, Doerge RW, Farber CR,**  
911 **Forejt J, Gaile D, Garlow SJ, Geiger H, Gershenfeld H, Gordon T, Gu J, Gu W, de**  
912 **Haan G, Hayes NL, Heller C, Himmelbauer H, Hitzemann R, Hunter K, Hsu HC,**  
913 **Iraqi FA, Ivandic B, Jacob HJ, Jansen RC, Jepsen KJ, Johnson DK, Johnson TE,**  
914 **Kempermann G, et al.** 2004. The Collaborative Cross, a community resource for the  
915 genetic analysis of complex traits. *Nat Genet* **36**:1133-1137.
- 916 69. **Duffy MR, Chen TH, Hancock WT, Powers AM, Kool JL, Lanciotti RS, Pretrick M,**  
917 **Marfel M, Holzbauer S, Dubray C, Guillaumot L, Griggs A, Bel M, Lambert AJ,**  
918 **Laven J, Kosoy O, Panella A, Biggerstaff BJ, Fischer M, Hayes EB.** 2009. Zika virus  
919 outbreak on Yap Island, Federated States of Micronesia. *The New England journal of*  
920 *medicine* **360**:2536-2543.
- 921 70. **Aliota MT, Caine EA, Walker EC, Larkin KE, Camacho E, Osorio JE.** 2016.  
922 Characterization of Lethal Zika Virus Infection in AG129 Mice. *PLoS Negl Trop Dis*  
923 **10**:e0004682.

- 924 71. **Dowall SD, Graham VA, Rayner E, Atkinson B, Hall G, Watson RJ, Bosworth A,**  
925 **Bonney LC, Kitchen S, Hewson R.** 2016. A Susceptible Mouse Model for Zika Virus  
926 Infection. *PLoS neglected tropical diseases* **10**:e0004658.
- 927 72. **Noll KE, Ferris MT, Heise MT.** 2019. The Collaborative Cross: A Systems Genetics  
928 Resource for Studying Host-Pathogen Interactions. *Cell Host & Microbe* **25**:484-498.
- 929 73. **do Valle TZ, Billecocq A, Guillemot L, Alberts R, Gomet C, Geffers R, Calabrese**  
930 **K, Schughart K, Bouloy M, Montagutelli X, Panthier JJ.** 2010. A new mouse model  
931 reveals a critical role for host innate immunity in resistance to Rift Valley fever. *J*  
932 *Immunol* **185**:6146-6156.
- 933 74. **Le-Trilling VT, Trilling M.** 2017. Mouse newborn cells allow highly productive mouse  
934 cytomegalovirus replication, constituting a novel convenient primary cell culture system.  
935 *PLoS One* **12**:e0174695.
- 936 75. **Setoh YX, Peng NY, Nakayama E, Amarilla AA, Prow NA, Suhrbier A, Khromykh**  
937 **AA.** 2018. Fetal Brain Infection Is Not a Unique Characteristic of Brazilian Zika Viruses.  
938 *Viruses* **10**.
- 939 76. **Savidis G, Perreira JM, Portmann JM, Meraner P, Guo Z, Green S, Brass AL.**  
940 2016. The IFITMs Inhibit Zika Virus Replication. *Cell Rep* **15**:2323-2330.
- 941 77. **Lang J, Cheng Y, Rolfe A, Hammack C, Vera D, Kyle K, Wang J, Meissner TB, Ren**  
942 **Y, Cowan C, Tang H.** 2018. An hPSC-Derived Tissue-Resident Macrophage Model  
943 Reveals Differential Responses of Macrophages to ZIKV and DENV Infection. *Stem Cell*  
944 *Reports* **11**:348-362.
- 945 78. **Pachulec E, Abdelwahed Bagga RB, Chevallier L, O'Donnell H, Guillas C, Jaubert**  
946 **J, Montagutelli X, Carniel E, Demeure CE.** 2017. Enhanced Macrophage M1

- 947 Polarization and Resistance to Apoptosis Enable Resistance to Plague. *J Infect Dis*  
948 **216**:761-770.
- 949 79. **Horisberger MA, Staeheli P, Haller O.** 1983. Interferon induces a unique protein in  
950 mouse cells bearing a gene for resistance to influenza virus. *Proc Natl Acad Sci U S A*  
951 **80**:1910-1914.
- 952 80. **Keele GR, Crouse WL, Kelada SNP, Valdar W.** 2019. Determinants of QTL Mapping  
953 Power in the Realized Collaborative Cross. *G3 (Bethesda)* doi:10.1534/g3.119.400194.
- 954 81. **Simon-Loriere E, Lin RJ, Kalayanarooj SM, Chuansumrit A, Casademont I, Lin**  
955 **SY, Yu HP, Lert-Itthiporn W, Chaiyaratana W, Tangthawornchaikul N,**  
956 **Tangnararatchakit K, Vasanawathana S, Chang BL, Suriyaphol P, Yoksan S,**  
957 **Malasit P, Despres P, Paul R, Lin YL, Sakuntabhai A.** 2015. High Anti-Dengue Virus  
958 Activity of the OAS Gene Family Is Associated With Increased Severity of Dengue. *J*  
959 *Infect Dis* **212**:2011-2020.
- 960 82. **Welsh CE, Miller DR, Manly KF, Wang J, McMillan L, Morahan G, Mott R, Iraqi**  
961 **FA, Threadgill DW, de Villena FP.** 2012. Status and access to the Collaborative Cross  
962 population. *Mamm Genome* **23**:706-712.
- 963 83. **Fansiri T, Fontaine A, Diancourt L, Caro V, Thaisomboonsuk B, Richardson JH,**  
964 **Jarman RG, Ponlawat A, Lambrechts L.** 2013. Genetic mapping of specific  
965 interactions between *Aedes aegypti* mosquitoes and dengue viruses. *PLoS Genet*  
966 **9**:e1003621.
- 967 84. **Tokuda S, Do Valle TZ, Batista L, Simon-Chazottes D, Guillemot L, Bouloy M,**  
968 **Flamand M, Montagutelli X, Panthier JJ.** 2015. The genetic basis for susceptibility to  
969 Rift Valley fever disease in MBT/Pas mice. *Genes Immun* **16**:206-212.

- 970 85. **Sheehan KC, Lazear HM, Diamond MS, Schreiber RD.** 2015. Selective Blockade of  
971 Interferon-alpha and -beta Reveals Their Non-Redundant Functions in a Mouse Model of  
972 West Nile Virus Infection. *PLoS One* **10**:e0128636.
- 973 86. **Shimizu S.** 2004. CHAPTER 32 - Routes of Administration, p 527-542. *In* Hedrich HJ,  
974 Bullock G (ed), *The Laboratory Mouse* doi:[https://doi.org/10.1016/B978-012336425-](https://doi.org/10.1016/B978-012336425-8/50085-6)  
975 [8/50085-6](https://doi.org/10.1016/B978-012336425-8/50085-6). Academic Press, London.
- 976 87. **Lanciotti RS, Kosoy OL, Laven JJ, Velez JO, Lambert AJ, Johnson AJ, Stanfield**  
977 **SM, Duffy MR.** 2008. Genetic and serologic properties of Zika virus associated with an  
978 epidemic, Yap State, Micronesia, 2007. *Emerg Infect Dis* **14**:1232-1239.
- 979 88. **Faye O, Faye O, Diallo D, Diallo M, Weidmann M, Sall AA.** 2013. Quantitative real-  
980 time PCR detection of Zika virus and evaluation with field-caught mosquitoes. *Virology*  
981 **10**:311.
- 982 89. **Fontaine A, Jiolle D, Moltini-Conclois I, Lequime S, Lambrechts L.** 2016. Excretion  
983 of dengue virus RNA by *Aedes aegypti* allows non-destructive monitoring of viral  
984 dissemination in individual mosquitoes. *Sci Rep* **6**:24885.
- 985 90. **Verdonk F, Roux P, Flamant P, Fiette L, Bozza FA, Simard S, Lemaire M, Plaud B,**  
986 **Shorte SL, Sharshar T, Chretien F, Danckaert A.** 2016. Phenotypic clustering: a novel  
987 method for microglial morphology analysis. *J Neuroinflammation* **13**:153.
- 988 91. **Broman KW, Gatti DM, Simecek P, Furlotte NA, Prins P, Sen S, Yandell BS,**  
989 **Churchill GA.** 2019. R/qtl2: Software for Mapping Quantitative Trait Loci with High-  
990 Dimensional Data and Multiparent Populations. *Genetics* **211**:495-502.

991

992

993

## 994 **FIGURE LEGENDS**

995 **FIG 1** ZIKV disease severity in *Ifnar1*-deficient mice is driven by the genetic background.

996 6-7 week-old 129-*Ifnar1* (n = 7) and B6-*Ifnar1* (n = 10) mice were infected IP with  $10^7$  FFUs of  
997 ZIKV FG15 and monitored for 14 days. (A) Average clinical score, with numerical values given  
998 as follows: 0, no symptom; 1, ruffled fur; 2, emaciation, hunched posture and/or hypo activity; 3,  
999 hind limb weakness, prostration and/or closed eyes; and 4, moribund or dead. (B) Kaplan-Meier  
1000 survival curves showing 100% lethality in B6-*Ifnar1* mice at day 7 p.i. and survival of 6/7 129-  
1001 *Ifnar1* mice (logrank test, \*\*\* : p = 0.0002). B6-*Ifnar1* mice developed early symptoms which  
1002 rapidly evolved to death, while 129-*Ifnar1* mice developed symptoms two days later which  
1003 eventually resolved in most mice.

1004 **FIG 2** Establishment and validation of the experimental conditions for assessing susceptibility to  
1005 ZIKV in CC strains. (A) The efficacy of the MAR1-5A3 mAb to block the IFNAR receptor in  
1006 diverse mouse genetic backgrounds was determined by Western blotting on mouse embryonic  
1007 fibroblasts (MEFs) derived from C57BL/6J, CC001 and CC071 strains. The phosphorylation of  
1008 STAT1 was equally induced by IFN- $\alpha$  stimulation and fully inhibited by the MAR1-5A3 mAb in  
1009 the three strains, as in the untreated and unstimulated CD-1 MEFs. (B) When treated with  
1010 MAR1-5A3 24h prior to ZIKV infection (filled circles), mice of both CC001 and CC071 strains  
1011 (n = 9 and 8, respectively) were much more permissive to viral replication with 4 to 5  $\log_{10}$  times  
1012 more copies of viral genome than mice without treatment (open circles; n = 3 and 2,  
1013 respectively) throughout the first three days p.i. ("x" denotes a sample below the detection level).  
1014 (C) The kinetics of plasma viral load in 129-*Ifnar1* and 4 CC strains showed a maximum in most  
1015 individuals at day 2 p.i. which was subsequently selected to measure peak viral load in all CC

1016 strains. Each circle represents a mouse analyzed on days 1, 2, 3 and 6. (D) Correlation between  
1017 plasma viral load determined by FFA (x-axis) and RT-qPCR (y-axis) was established on 46  
1018 blood samples from 129-*Ifnar1*, B6-*Ifnar1* and 10 CC strains (circles show the mean of each  
1019 strain; the number of mice per strain is shown in parentheses). The two variables were strongly  
1020 correlated over a 3 log<sub>10</sub> range of viral genome copies ( $r^2 = 0.89$ ,  $p = 9.9 \times 10^{-17}$ ), the number of  
1021 genome copies by RT-qPCR being on average 3 log<sub>10</sub> units higher than the viral titer by FFA. (E)  
1022 Plasma viral load at day 2 p.i. was not significantly different ( $p = 0.24$ ) between males and  
1023 females of 129-*Ifnar1* and 4 CC strains for which age-matched mice of both sexes had been  
1024 tested (with  $n \geq 4$  mice per group).

1025 **FIG 3** CC genetic diversity strongly impacts clinical severity and plasma viral load. Thirty-five  
1026 CC strains ( $n = 2$  to 9 per strain) were infected IP with  $10^7$  FFUs of ZIKV FG15, 24hr after IP  
1027 injection of 2 mg of MAR1-5A3 mAb. 129-*Ifnar1* ( $n = 24$ ) and B6-*Ifnar1* ( $n = 5$ ) mice were  
1028 similarly infected without mAb treatment. (A) Clinical scores at day 7 p.i. as the percentage of  
1029 mice in the five levels of severity (same as in FIG 1). Most CC strains did not show any  
1030 symptoms, while 78% (7/9) of CC071 died before day 8 p.i. (B) Plasma viral load at days 2  
1031 (upper values) and 6 p.i. (lower values) quantified by RT-qPCR, shown as box-whisker plot with  
1032 outliers as dots (strains are shown in the same order as in A). CC genetic background had a  
1033 highly significant effect on viral load at day 2 p.i. (Kruskal-Wallis,  $p = 4.8 \times 10^{-15}$ ) and day 6 p.i.  
1034 (Kruskal-Wallis,  $p = 1.1 \times 10^{-10}$ ). (C) Difference between plasma viral loads at days 2 and 6 p.i.  
1035 Strains are sorted by increasing absolute difference, therefore in a different order from A and B.  
1036 CC genetic background had a highly significant effect on viral load decrease (Kruskal-Wallis,  $p$   
1037  $= 2.2 \times 10^{-12}$ ). Likewise, viral load decreased much faster in 129-*Ifnar1* than in B6-*Ifnar1* mice



1038 (Wilcoxon, \*\*\* :  $p = 1.7 \times 10^{-5}$ ). (B and C) Arrows indicate the subset of CC mouse strains  
1039 selected for detailed study.

1040 **FIG 4** The differences in susceptibility to ZIKV between CC strains are conserved with other  
1041 flaviviruses. (A) Mice from three selected CC strains treated with MAR1-5A3 mAb and 129-  
1042 *Ifnar1* mice were infected intraperitoneally with  $10^3$  FFUs of ZIKV HD78788. Left : average  
1043 clinical score, with numerical values given as in FIG 1. CC071 and 129-*Ifnar1* mice rapidly  
1044 developed severe symptoms and died while CC001 and CC005 mice were mostly resistant.  
1045 Center : Kaplan-Meier survival curves (logrank test). Right : plasma viral load at day 2 p.i.,  
1046 measured by RT-qPCR and expressed as ZIKV genome copies per milliliter, was much lower in  
1047 CC001 than in the two other CC strains (Wilcoxon). (B) Viral load after ZIKV infection (left,  
1048 data extracted from FIG 3) and DENV infection (right, IV infection with  $2 \cdot 10^6$  FFUs of DENV  
1049 KDH0026A) was compared in mAb-treated CC001, CC071 and B6 mice and in 129-*Ifnar1* and  
1050 B6-*Ifnar1*. Most between-strain differences were conserved between the two viruses (*t* test). (C)  
1051 Left : Kaplan-Meier survival curves of four male mice of each of the three selected CC strains  
1052 infected IP with 1000 FFU of WNV strain IS-98-ST1 and monitored for 14 days. CC071 died  
1053 earlier than CC005 and CC001 mice (logrank test). Right : Kaplan-Meier survival curves of four  
1054 to five male mice of BALB/cByJ and each of the three selected CC strains infected IP with 100  
1055 PFUs of RVFV strain ZH548 and monitored for 14 days. No significant difference was found  
1056 among the three CC strains and only CC001 mice survived longer than BALB/c mice (logrank  
1057 test,  $p > 0.05$ ). \*  $p < 0.05$ ; \*\*  $p < 0.01$ ; \*\*\*  $p < 0.001$ .

1058 **FIG 5** Genetic analysis of susceptibility to ZIKV fails to identify simple genetic control.  
1059 Genome-wide linkage analysis for the plasma viral load at day 2 p.i.(A), the plasma viral load at  
1060 day 6 p.i. (B) and the decrease rate of plasma viral load (C) on the 35 CC strains shown on FIG

1061 3. The x-axis represents genomic location; the y-axis is the LOD score, representing the  
1062 statistical association between the phenotype and the genomic location. Genome-wide thresholds  
1063  $p = 0.1$ ,  $p = 0.05$  and  $p = 0.01$ , computed from 1000 permutations, are represented by dashed  
1064 black, dashed red and plain red lines, respectively. No genome location reached the  $p = 0.05$   
1065 threshold.

1066 **FIG 6** Genetic variations between CC strains control brain viral load and histological profile of  
1067 infected mice. Four to five mice of 129-*Ifnar1* and three selected CC strains were infected IP  
1068 with  $10^7$  FFUs of ZIKV FG15 24hr after IP injection of 2 mg of MAR1-5A3 mAb. Top : Brain  
1069 viral load was measured by RT-qPCR at day 6 p.i. (Wilcoxon, \* :  $p < 0.05$ ). Bottom :  
1070 Representative brain sections of the same ZIKV FG15-infected mice, at day 6 p.i. (A-C) Lesions  
1071 were clearly more severe for 129-*Ifnar1* mice ( $n=3$ ), with subacute leptomeningo-encephalitis  
1072 (*i.e.* infiltration of perivascular spaces and leptomeninges by lymphocytes, plasma cells and  
1073 macrophages; arrows) and (D-E) activation of microglial cells with microglial nodules  
1074 (arrowheads). (F-G) CC001 mice ( $n=5$ ) displayed no significant histological lesions in the brain  
1075 with normal resting (non-activated) microglial cells (H-I). Only very rare small clusters of  
1076 activated microglial cells were detected (data not shown). By contrast, CC005 mice ( $n=5$ )  
1077 displayed moderate inflammatory lesions characterized by (J-K) perivascular cuffing (arrow;  
1078  $n=2$ ), (L-M) activation of microglial cells (hyperplasia and thickening of cell processes) and  
1079 microglial nodules (arrowheads;  $n=5$ ). CC071 mice ( $n=4$ ) also displayed inflammatory lesions  
1080 but with intermediate severity: (N-O) almost no lesions in HE but (P-Q) activation of microglial  
1081 cells and microglial nodules (arrowhead). A, B, C, F, G, J, K, N, O : HE staining; D, E, H, I, L,  
1082 M, P, Q : anti-Iba1 immunohistochemistry.

1083 **FIG 7** Intracranial ZIKV FG15 infection results in strain-dependent viral load and brain  
1084 histological lesions. Mice of 129-*Ifnar1* and three selected CC strains (3-5 mice per strain) were  
1085 infected IC with  $10^5$  FFUs of ZIKV FG15 in the absence of prior anti-IFNAR treatment. Top:  
1086 CC005 and CC071 mice show significantly higher brain viral load at day 6 p.i. than CC001 mice  
1087 (Wilcoxon, \*\* :  $p < 0.01$ ). Bottom : After intracranial inoculation, lesion profiles were clearly  
1088 different from those observed after IP inoculation. (A-C) 129-*Ifnar1* mice (n=4), still displayed  
1089 marked subacute leptomeningo-encephalitis (arrow: leptomeningitis) and (D-E) activation of  
1090 microglial cells. Two of the 5 CC001 mice displayed no significant histological lesions with  
1091 normal resting microglial cells, while the other three displayed (J-K) minimal lesions with  
1092 gliosis, and (H-I) rare small clusters of activated microglial cells. In this experimental model,  
1093 CC005 mice displayed heterogeneous lesion profiles with either (i) suspected meningitis and (J-  
1094 K) gliosis (n=4/5), or (ii) moderate leptomeningo-encephalitis (n=1/5). (L-M) Activation of  
1095 microglial cells (arrowhead), with variable severity, was detected in all animals (n=5/5).  
1096 Strikingly, (N-P) all CC071 mice (n=5/5) displayed marked leptomeningo-encephalitis (arrow:  
1097 leptomeningitis) with (Q-R) strong activation of microglial cells. A, B, C, F, G, J, K, N, O, P :  
1098 HE staining; D, E, H, I, L, M, Q, R : anti-Iba1 immunohistochemistry.

1099 **FIG 8** *In vivo* susceptibility to ZIKV FG15 in CC071 correlates with increased viral replication  
1100 *in vitro* compared with CC001. Mouse cells were infected with ZIKV FG15 at MOI 5. ZIKV  
1101 titer in the supernatant was quantified by focus-forming assay at 24, 48 and 72 hours p.i. (A)  
1102 MEFs derived from CC001 (blue) and CC071 (red) embryos. Mean +/- SEM from 3 biological  
1103 replicates. At 48h and 72 h p.i., CC071 MEFs produced significantly higher virus titers. (B)  
1104 Macrophages isolated from peritoneal lavage. Mean +/- SEM from 2 replicates. CC071  
1105 macrophages produced significantly higher virus titers at the three time points. (C) Neurons from

1106 fetal brain dissected at day 16.5 of gestation and cultured for 12 days before infection. Mean +/-  
1107 SEM from 2 replicates. CC071 neurons produced significantly higher virus titers at 72 h p.i. (t  
1108 tests; \*  $p < 0.05$ , \*\*  $p < 0.01$ , \*\*\*  $p < 0.001$ ).

1109 **FIGURES**

1110

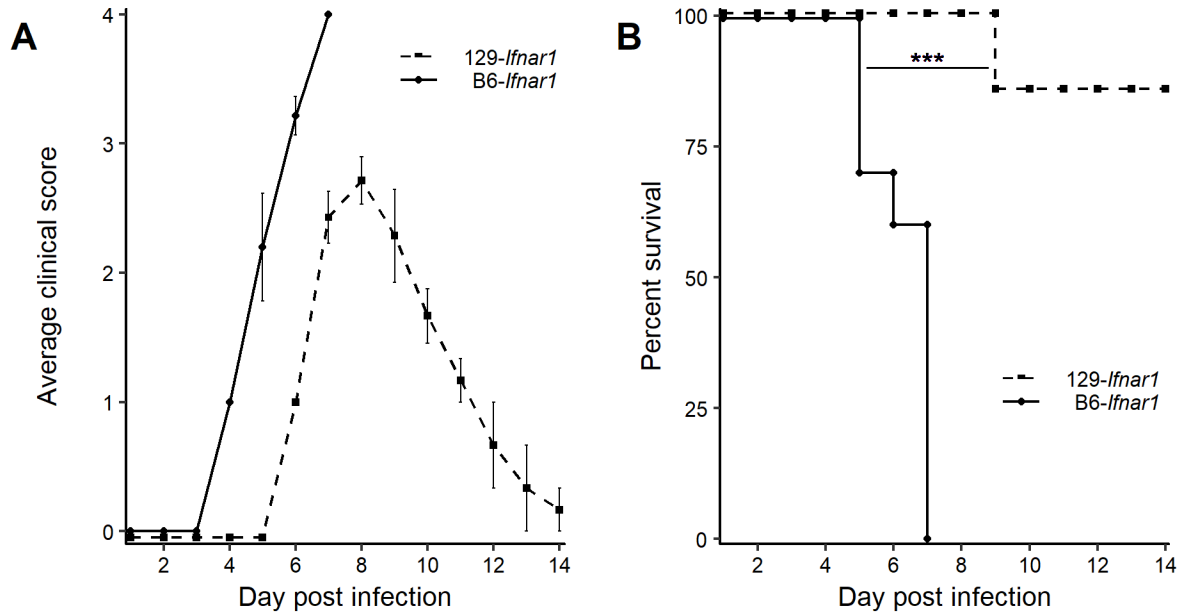

1111

1112 **Figure 1.**

1113

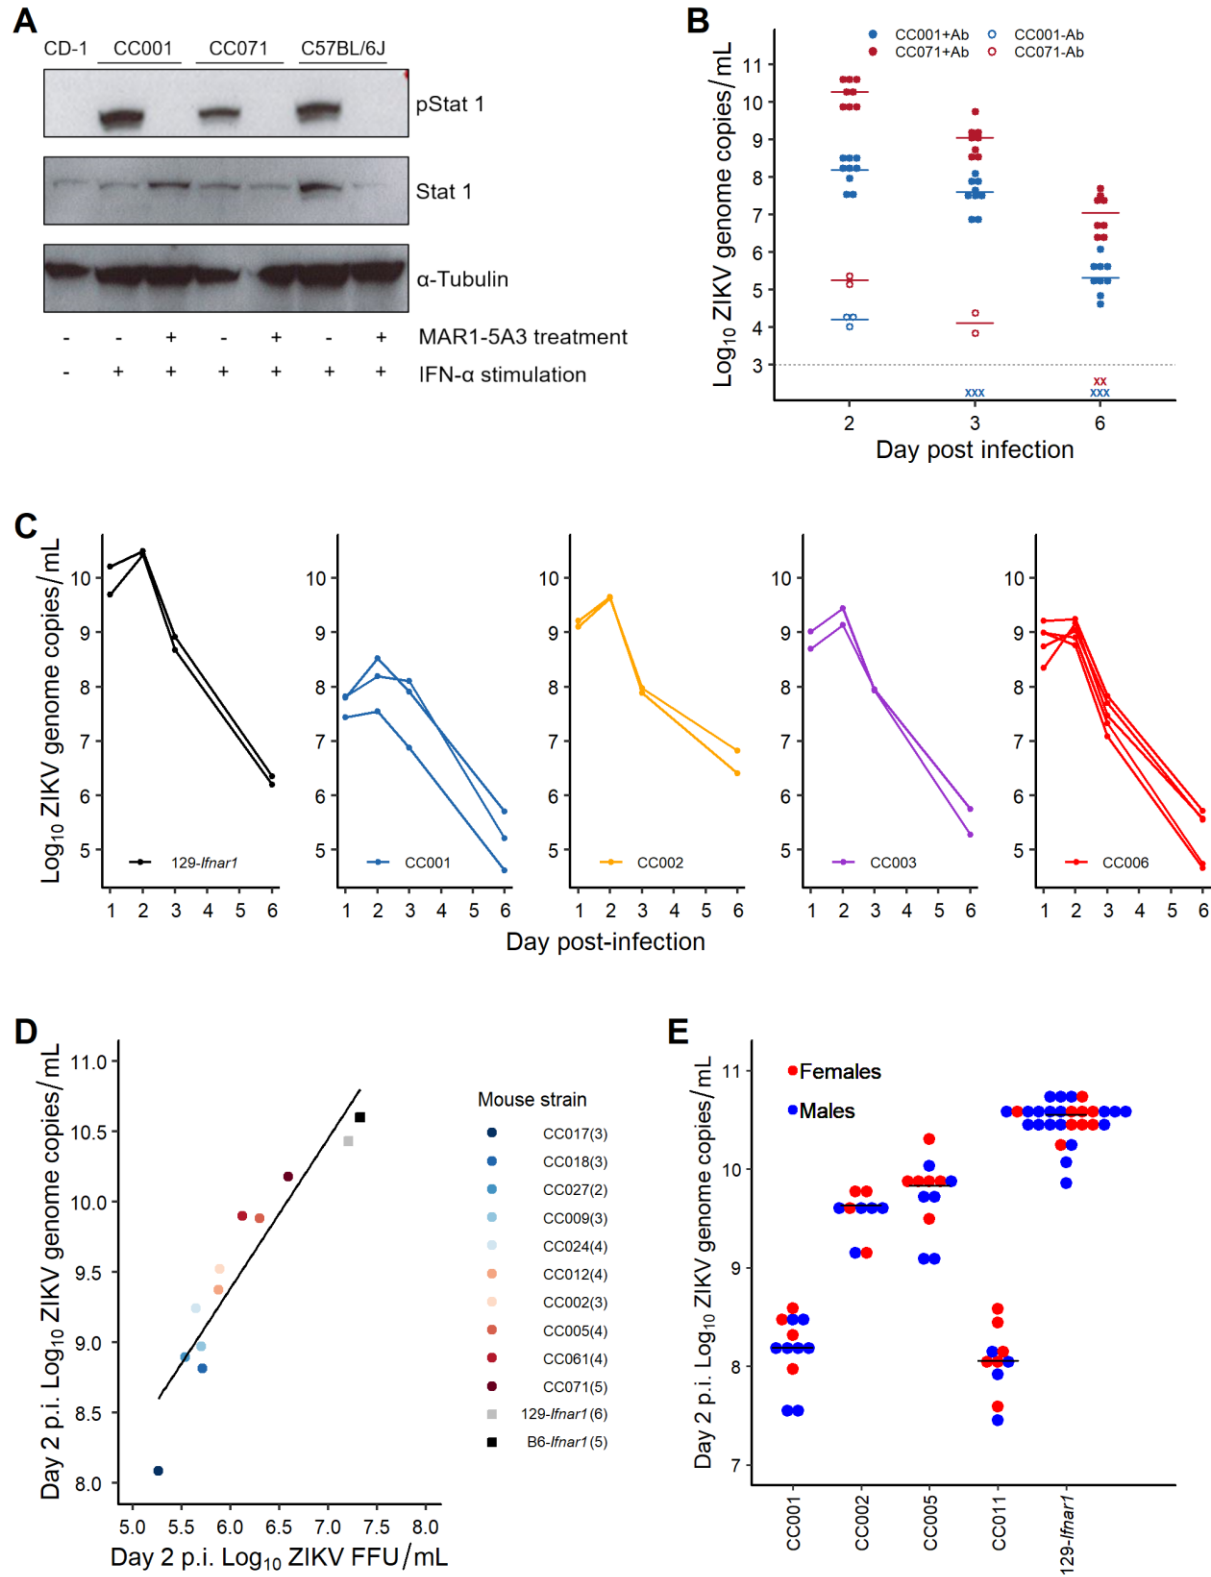

1114  
1115  
1116

**Figure 2.**

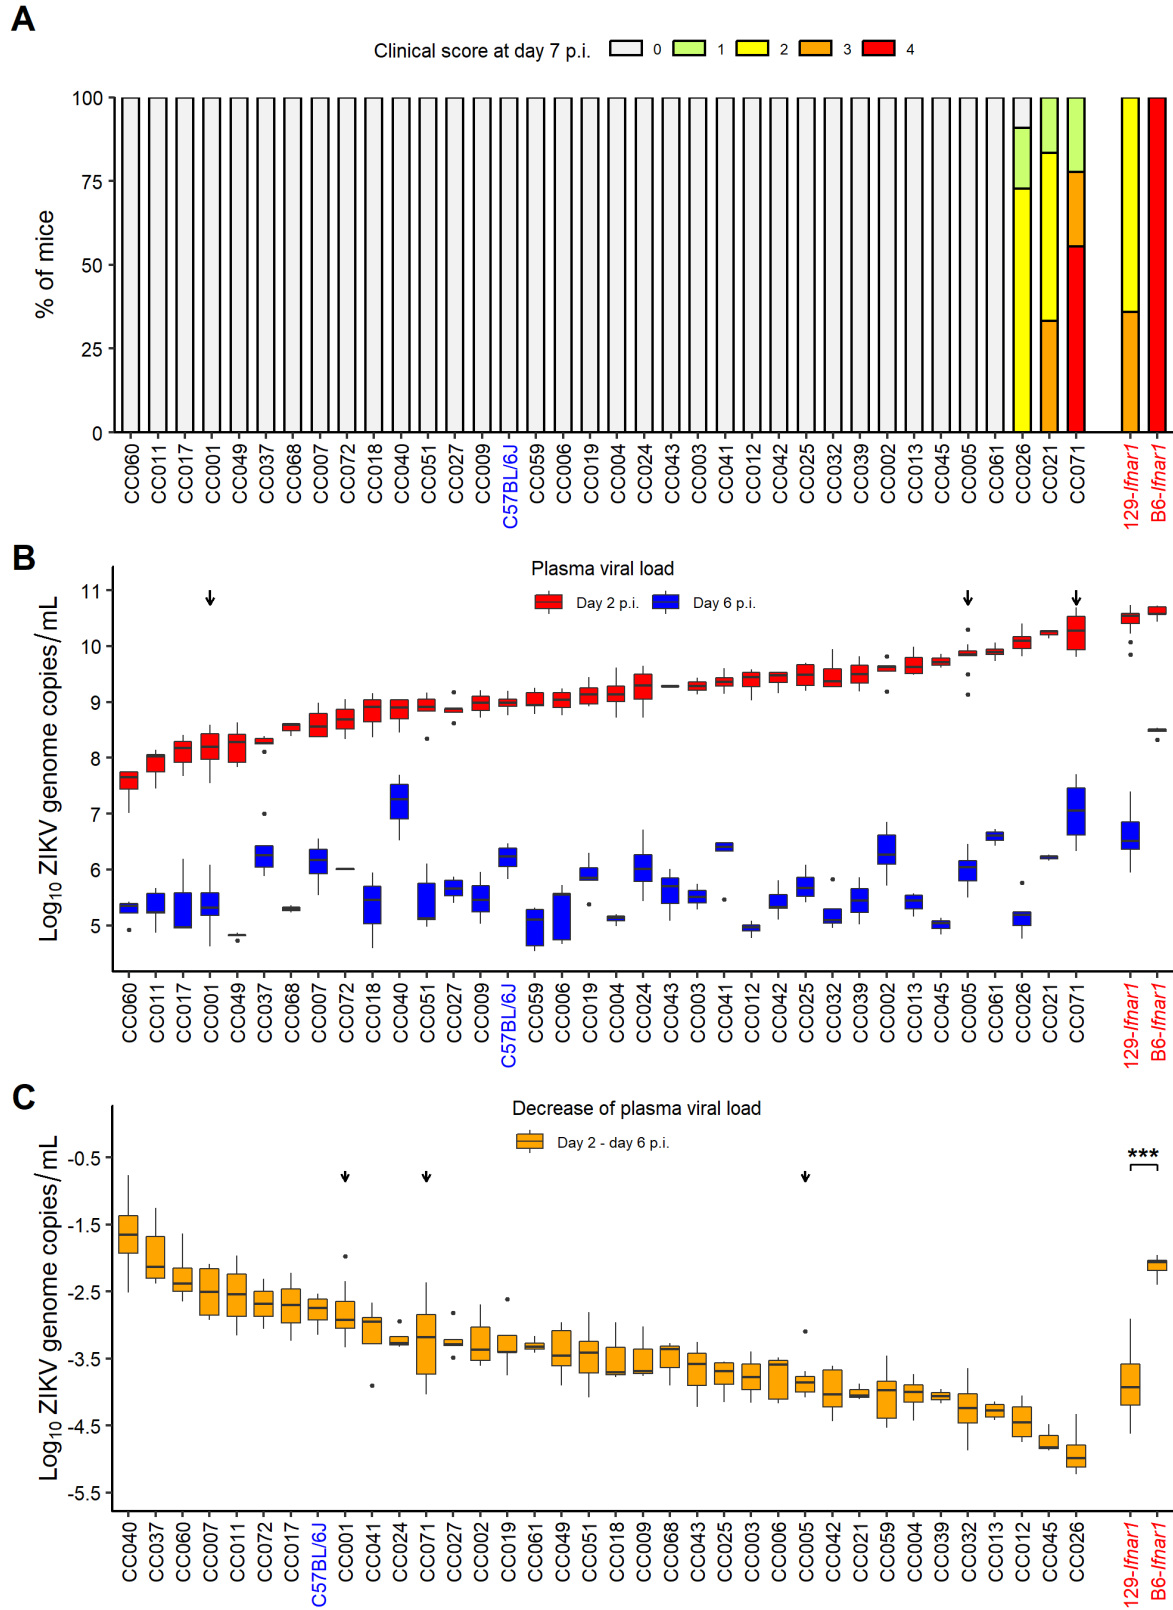

1117  
1118  
1119

**Figure 3.**

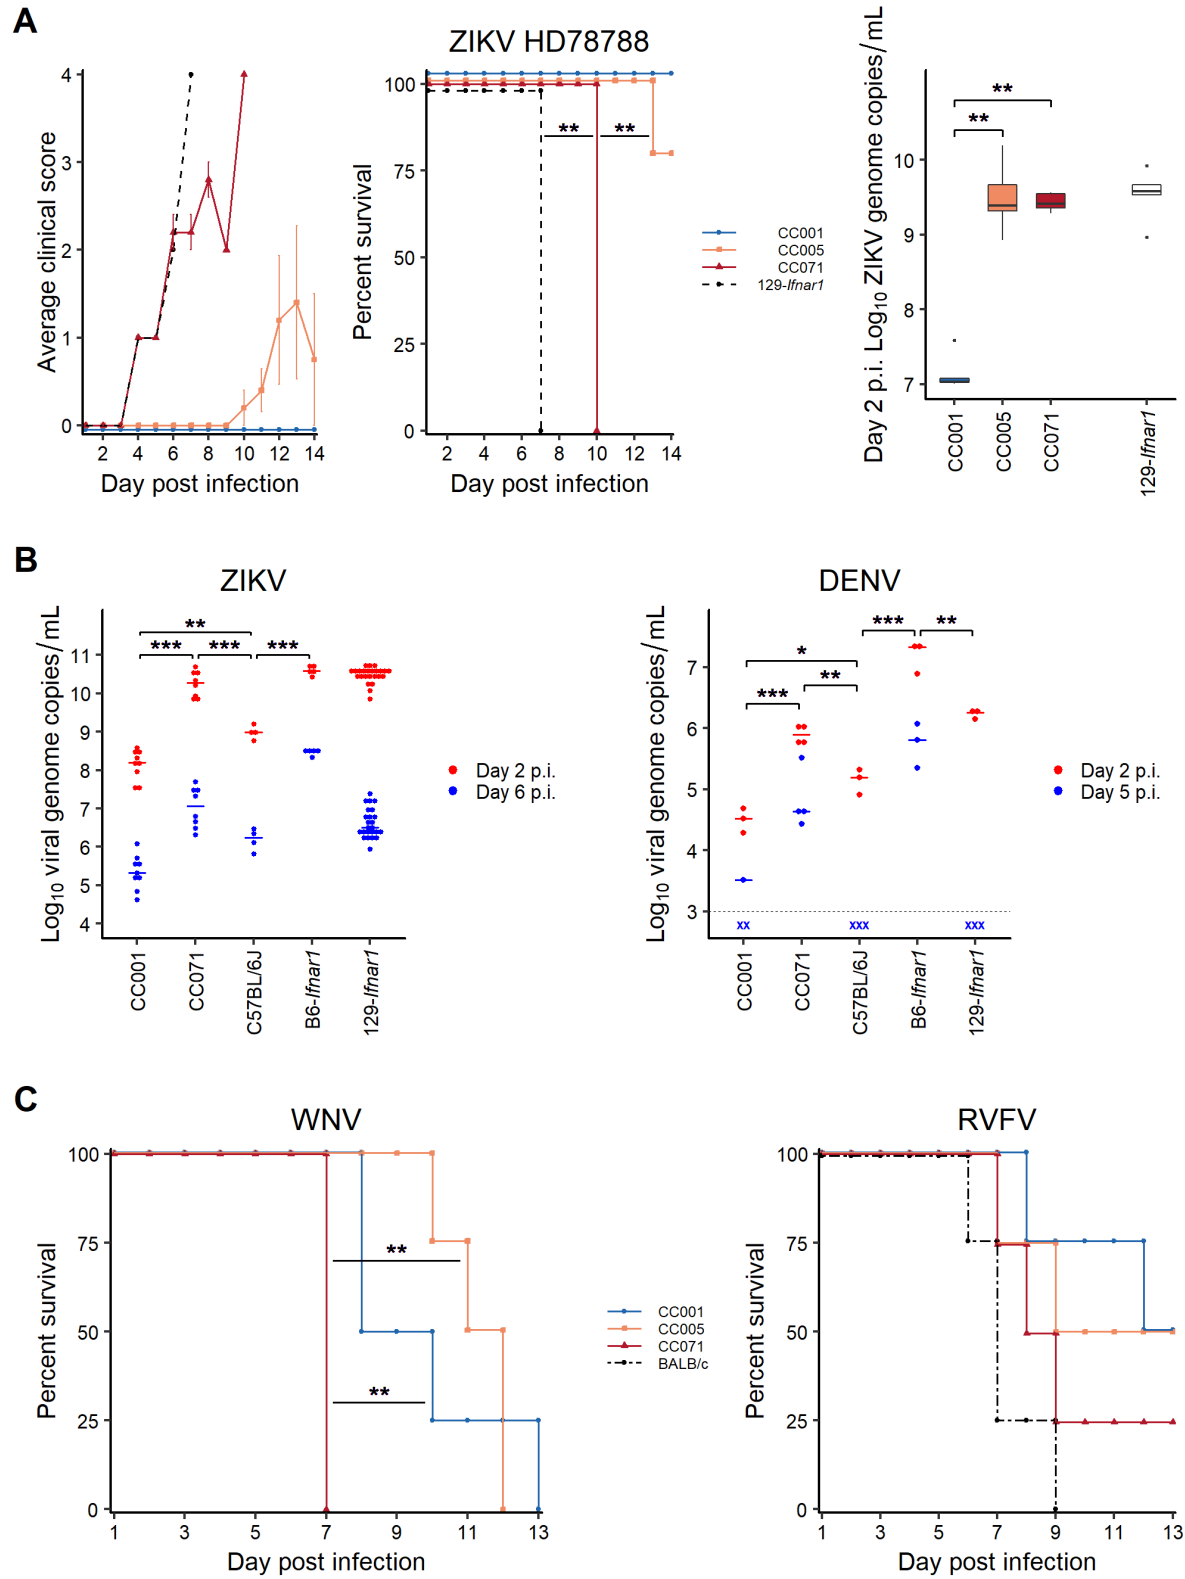

1120  
1121  
1122

**Figure 4.**

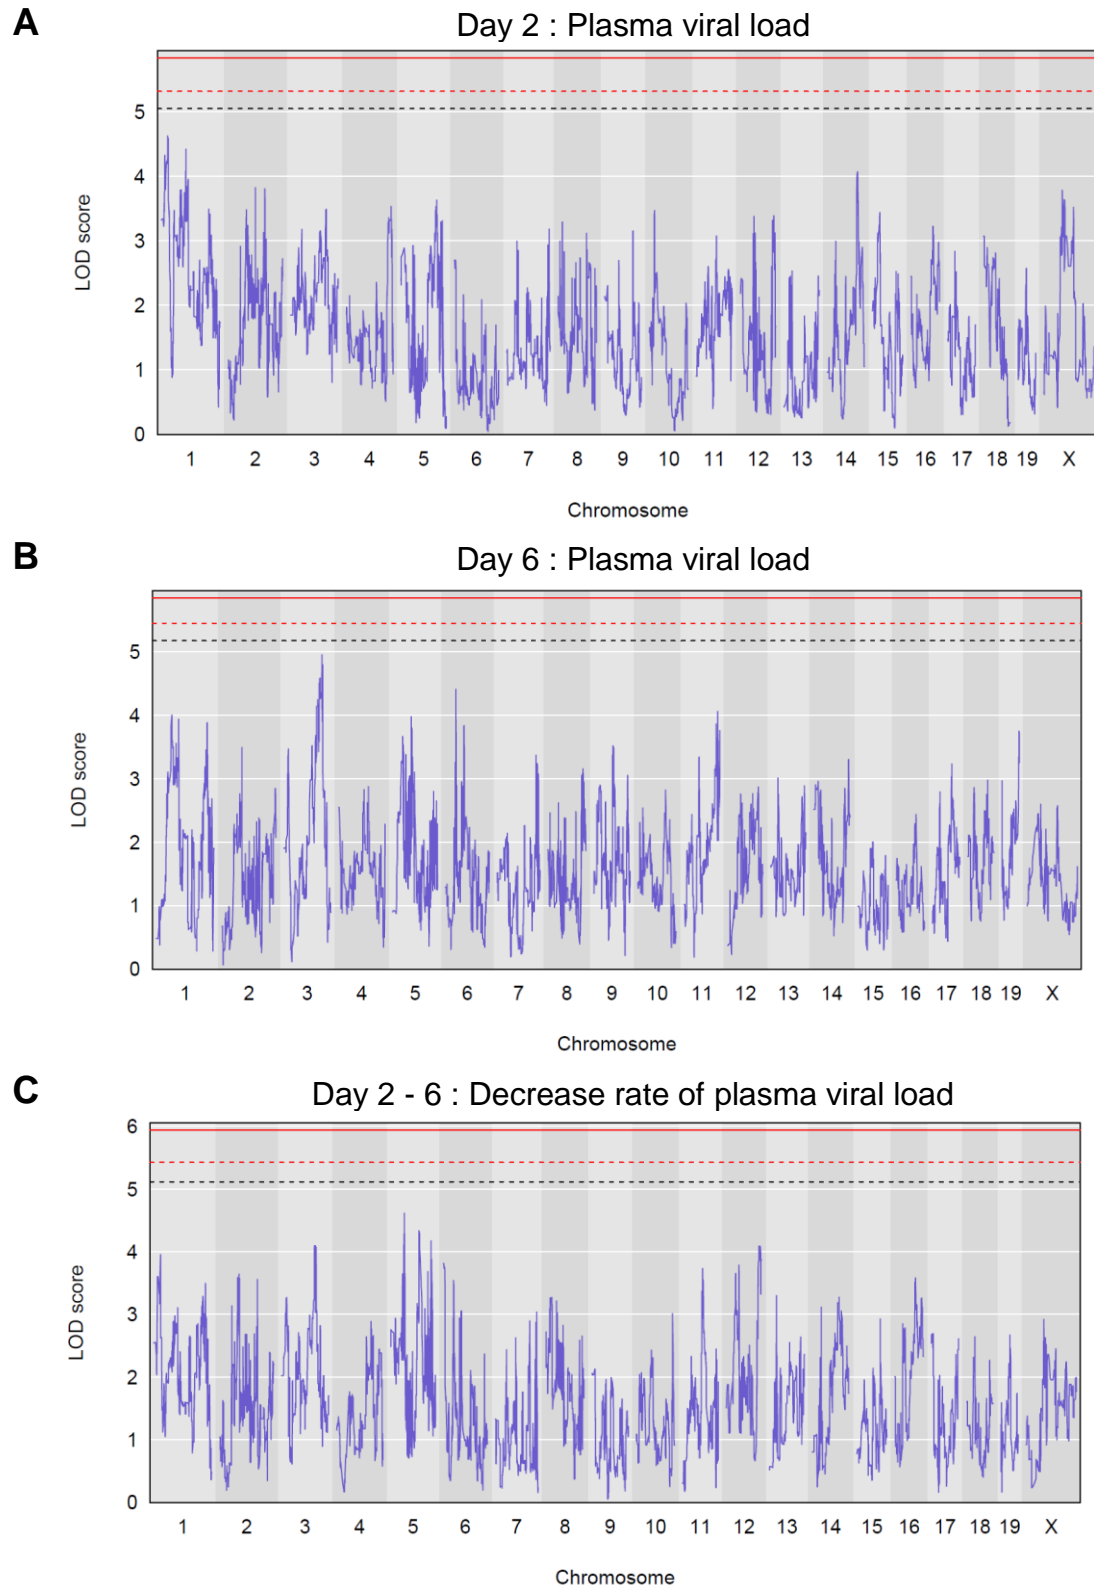

1123 **Figure 5.**  
1124



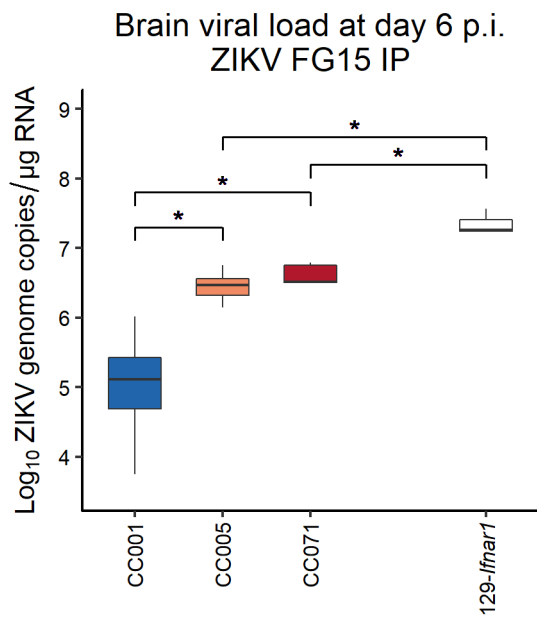

1125

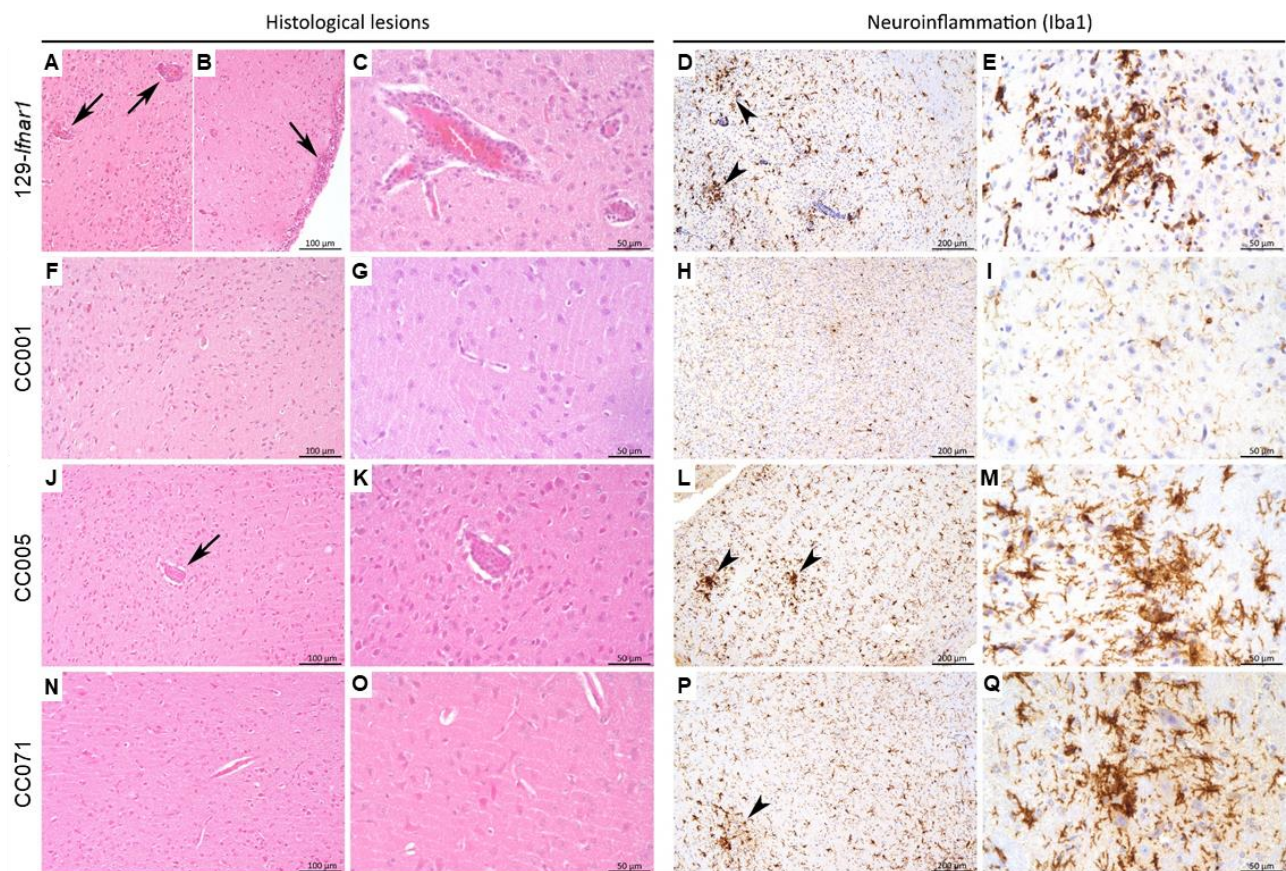

1126

1127

1128

**Figure 6.**

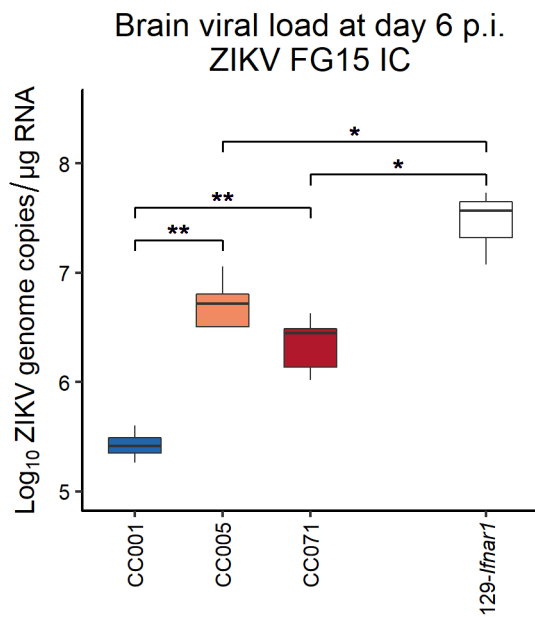

1129

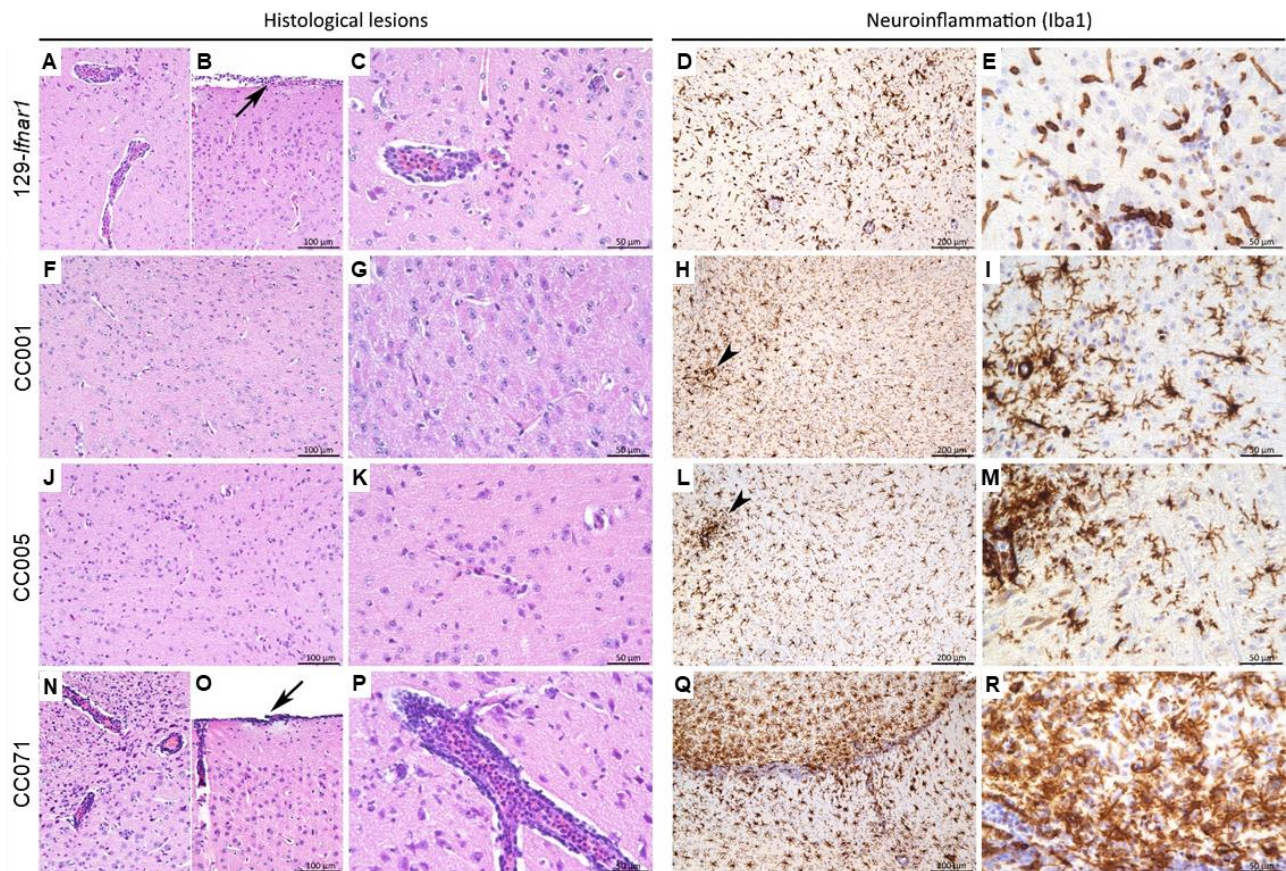

1130

1131

1132

**Figure 7.**

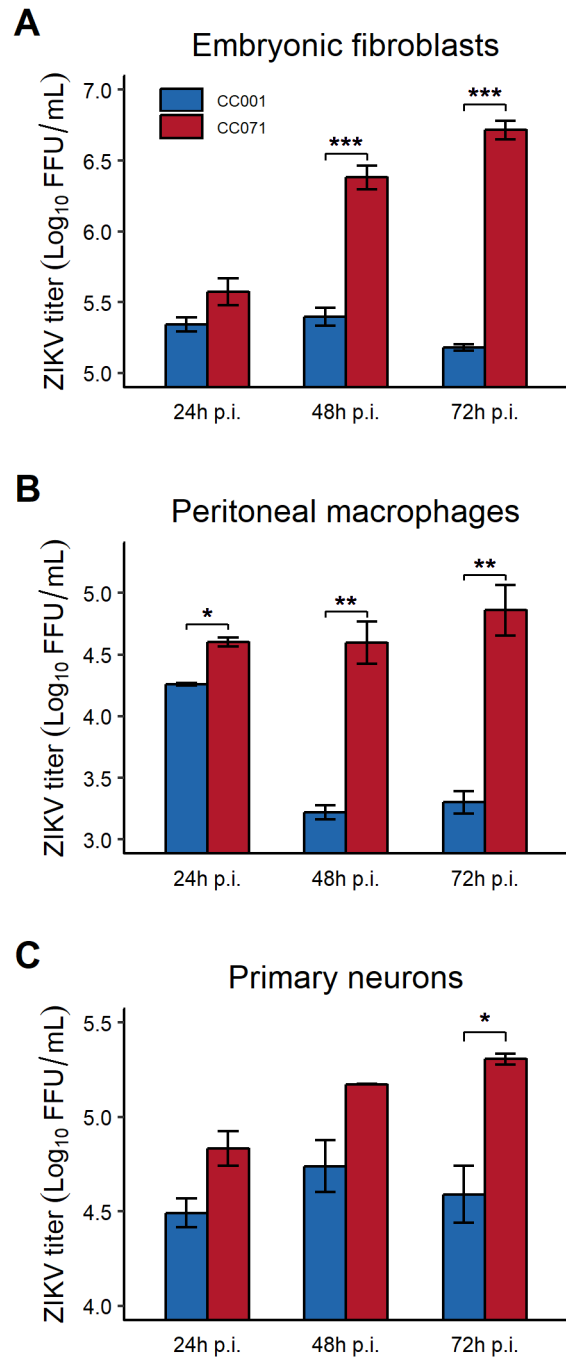

1133  
1134  
1135

**Figure 8.**

|                                            | CC001 | CC005 | CC071 | 129- <i>Ifnar1</i> |
|--------------------------------------------|-------|-------|-------|--------------------|
| Symptoms                                   | —     | —     | +     | +                  |
| Mortality                                  | 0%    | 0%    | 78%   | 12.5%              |
| Peak plasma viral load                     | +     | +     | +     | +                  |
| Rate of decrease of plasma viral load      | ↘     | ↓     | ↘     | ↓                  |
| Brain viral load (systemic infection)      | +     | +     | +     | +                  |
| Brain pathology (systemic infection)       | —     | +     | +     | +                  |
| Brain viral load (intracerebral infection) | +     | +     | +     | +                  |
| Brain pathology (intracerebral infection)  | +     | +     | +     | +                  |
| Viral replication in vitro (24-72 hours)   | ↘     | -     | ↗     | -                  |

1136

1137

1138

1139

**Table 1. Summary of the main features of ZIKV infection in mAb-treated CC strains and 129-*Ifnar1* mice.**
